1 **Microbial paracetamol degradation involves a high diversity**  
2 **of novel amidase enzyme candidates**

3 Ana B. Rios-Miguel<sup>a#</sup>, Garrett J. Smith<sup>a</sup>, Geert Cremers<sup>a</sup>, Theo van Alen<sup>a</sup>, Mike S.M. Jetten<sup>a,b</sup>, Huub J. M.  
4 Op den Camp<sup>a</sup>, Cornelia U. Welte<sup>a,b#</sup>

5

6 <sup>a</sup>Department of Microbiology, Radboud University, Radboud Institute for Biological and Environmental  
7 Sciences, Heyendaalseweg 135, 6525 AJ Nijmegen, The Netherlands

8 <sup>b</sup>Soehngen Institute of Anaerobic Microbiology, Radboud University, Heyendaalseweg 135, 6525 AJ  
9 Nijmegen, The Netherlands

10

11 #Address correspondence to Ana Rios-Miguel ([a.riosmiguel@science.ru.nl](mailto:a.riosmiguel@science.ru.nl)) and Cornelia Welte  
12 ([c.welte@science.ru.nl](mailto:c.welte@science.ru.nl))

13

14 Running title: Microbial Paracetamol degradation by novel amidases

15

16

17

18 **Abstract**

19 Pharmaceuticals are relatively new to nature and often not completely removed in wastewater  
20 treatment plants (WWTPs). Consequently, these micropollutants end up in water bodies all around  
21 the world posing a great environmental risk. One exception to this recalcitrant conversion is  
22 paracetamol, whose full degradation has been linked to several microorganisms. However, the  
23 genes and corresponding proteins involved in microbial paracetamol degradation are still elusive.  
24 In order to improve our knowledge of the microbial paracetamol degradation pathway, we  
25 inoculated a bioreactor with sludge of a hospital WWTP (Pharmafilter, Delft, NL) and fed it with  
26 paracetamol as the sole carbon source. Paracetamol was fully degraded without any lag phase and  
27 the enriched microbial community was investigated by metagenomic and metatranscriptomic  
28 analyses, which demonstrated that the microbial community was very diverse. Dilution and plating  
29 on paracetamol-amended agar plates yielded two *Pseudomonas* sp. isolates: a fast-growing  
30 *Pseudomonas* sp. that degraded 200 mg/L of paracetamol in approximately 10 hours while  
31 excreting a dark brown component to the medium, and a slow-growing *Pseudomonas* sp. that  
32 degraded paracetamol without obvious intermediates in more than 90 days. Each *Pseudomonas* sp.  
33 contained a different highly-expressed amidase (31% identity to each other). These amidase genes  
34 were not detected in the bioreactor metagenome suggesting that other as-yet uncharacterized  
35 amidases may be responsible for the first biodegradation step of paracetamol. Uncharacterized  
36 deaminase genes and genes encoding dioxygenase enzymes involved in the catabolism of aromatic  
37 compounds and amino acids were the most likely candidates responsible for the degradation of  
38 paracetamol intermediates based on their high expression levels in the bioreactor metagenome and  
39 the *Pseudomonas* spp. genomes. Furthermore, cross-feeding between different community  
40 members might have occurred to efficiently degrade paracetamol and its intermediates in the  
41 bioreactor. This study increases our knowledge about the ongoing microbial evolution towards  
42 biodegradation of pharmaceuticals and points to a large diversity of (amidase) enzymes that are  
43 likely involved in paracetamol metabolism in WWTPs.

44

45

|

46 **Keywords**

47 Acetaminophen, amidase evolution, deaminase, dioxygenase, mobile genetic elements,  
48 *Pseudomonas*.

49

50 **List of abbreviations used:**

51 WWTP: wastewater treatment plant

52 MBR: membrane bioreactor

53 GAC: granular activated carbon

54 APAP: N-acetyl-p-aminophenol or paracetamol

55 4-AP: 4-aminophenol

56 HQ: hydroquinone

57 HRT: hydraulic retention time

58 SRT: solid retention time

59 Pfast: *Pseudomonas* sp. isolate growing fast on APAP as sole carbon source

60 Pslow: *Pseudomonas* sp. isolate growing slow on APAP as sole carbon source.

61 HGT: horizontal gene transfer

62 MAG: metagenome-assembled genome

63 TPM: transcripts per million

64

65 **Highlights:**

- 66 • Paracetamol was fully degraded by activated sludge from hospital wastewater.
- 67 • Low paracetamol concentrations were removed by a diverse microbial community.
- 68 • *Pseudomonas* sp. dominated cultures with high paracetamol concentration.
- 69 • Uncharacterized amidases are probably involved in degrading paracetamol in WWTPs.
- 70 • Deaminases and dioxygenases might be degrading paracetamol transformation products.

71

72

|

## 73 1. INTRODUCTION

74 Hundreds of pharmaceutical compounds are being detected at low concentrations in water bodies all around  
75 the world posing a severe risk to the environment and to human health (Gavrilescu et al., 2015; Wilkinson  
76 John et al., 2022). The consumption of medication and personal care products will most likely only increase  
77 in the future. Therefore, there is an urgent need to develop new technologies able to remove these chemicals  
78 at low concentrations before reaching the environment. Until now, cost-efficient removal of common  
79 pollutants (i.e. ammonium-nitrogen) has been achieved using microorganisms in wastewater treatment plants  
80 (WWTPs). As large-scale use of pharmaceuticals has only recently resulted in discharge to many different  
81 environments, the metabolic pathways of their conversion (at relatively low concentrations) might not have  
82 evolved yet or might not be very efficient.

83  
84 Unlike many other pharmaceuticals, acetaminophen (N-acetyl-p-aminophenol, APAP), more commonly  
85 known as paracetamol, is degraded by microorganisms and is often fully removed in WWTPs. Several  
86 microorganisms have been related to APAP degradation in activated sludge and soil samples (i.e.  
87 *Penicillium*, *Pseudomonas*, *Flavobacterium*, *Dokdonella*, *Ensifer*, *Delftia*) (Hart and Orr, 1974; Palma et al.,  
88 2018; Park and Oh, 2020a; b; Rios-Miguel et al., 2021; Žur et al., 2018a). However, the genomes of these  
89 microorganisms have not yet been reported and therefore, the responsible genes and mechanisms for APAP  
90 biodegradation in WWTPs are not yet known.

91  
92 4-Aminophenol (4-AP) and hydroquinone (HQ) have been measured in several APAP biodegradation  
93 experiments (Park and Oh, 2020a; b; Zhang et al., 2013). Consequently, an aryl acylamidase, a deaminase,  
94 and hydroquinone 1,2-dioxygenase were proposed as enzymes potentially involved in the biodegradation  
95 pathway of APAP (dos S. Grignet et al., 2022; Lee et al., 2015; Žur et al., 2018b). In fact, five amidases have  
96 been shown to transform APAP to 4-AP or to a brown compound (Supplementary Table S1) (Chen et al.,  
97 2016; Ko et al., 2010; Lee et al., 2015; Yun et al., 2017; Zhang et al., 2012; Zhang et al., 2020; Zhang et al.,  
98 2019). Besides, 1,2,4-trihydroxybenzene could be an intermediate of APAP degradation since it was  
99 measured in a *Burkholderia* sp. degrading 4-AP (Takenaka et al., 2003). Despite this knowledge, the exact  
100 genes/enzymes that microorganisms are using for APAP biodegradation in the environment are currently  
101 unknown.

102 To fill this gap, we analyzed the microbial community obtained from a hospital WWTP that degraded APAP  
103 in a bioreactor by metagenomics and metatranscriptomics. Furthermore, we were able to isolate two  
104 *Pseudomonas* species from the bioreactor that were capable of growing on APAP. Our aim was to identify  
105 the genes involved in APAP biodegradation and determine the genomic location and organization of these  
106 genes (clusters) in different microorganisms. These results will help to understand the evolution of microbial  
107 metabolism towards biodegradation of pharmaceuticals and will provide molecular biomarkers to screen  
108 environments for APAP-degrading microorganisms.

109

## 110 **2. METHODS**

### 111 **2.1. Sampling and bioreactor set-up**

112 Biomass was obtained from a membrane bioreactor (MBR) and a granular activated carbon (GAC) process at  
113 the Pharmafilter WWTP in Delft, the Netherlands, on 1-2-2021. This plant treats wastewater and solid waste  
114 from the Reinier de Graaf hospital, in Delft, and consists of an anaerobic-anoxic-oxic MBR, an ozonation  
115 tank, and a GAC treatment (<https://www.stowa.nl/publicaties/evaluation-report-pharmafilter>). A laboratory-  
116 scale membrane bioreactor (1.5 L) was inoculated with 15 mL of the MBR biomass and 15 mL of the GAC  
117 biomass. The lab-scale membrane and bioreactor vessel were built at Radboud University technical center.  
118 The bioreactor appliances were from Applikon Biotechnology B.V. (Delft, The Netherlands). The membrane  
119 consisted of an integral immersed Zenon ZW-1 module with 0.04  $\mu\text{m}$  pore-sized hollow fibers from Suez  
120 Water Technologies & Solutions (Feasterville-Trevose, USA). It was never backwashed or replaced during  
121 the experiment. The bioreactor was fed with synthetic medium containing 0.05-0.4 g/L APAP (Merck,  
122  $\geq 99.0\%$ , Darmstadt, Germany) as sole carbon source, 0.2 g/L  $\text{K}_2\text{HPO}_4$ , 0.1 g/L  $\text{KH}_2\text{PO}_4$ , 0.06 g/L  $\text{NH}_4\text{Cl}$ ,  
123 0.01 g/L  $\text{MgSO}_4 \times 7 \text{H}_2\text{O}$ , 0.01 g/L  $\text{CaCl}_2$ , and trace elements solution (Rios-Miguel et al., 2021). Since  
124 APAP was degraded very fast, the organic loading rate was increased over the first 38 days from 0.022 to  
125 0.227 mg APAP/min. This was done by increasing the concentration of APAP in the medium to 400 mg/L  
126 and by reducing the hydraulic retention time (HRT) from 2.4 to 1.8 d. When bacterial growth became  
127 exponential, the solid retention time (SRT) was set to 10 d to reach a steady state. After about 90 d, the HRT  
128 was set to 3.7 d to determine the microbial community changes at lower APAP loading rates. Furthermore,

129 the bioreactor was run in the dark at constant 500 rpm stirring, a pH value of 7, an airflow rate of 30 ml/min,  
130 and room temperature ( $20 \pm 1$  °C). A pH sensor was connected to a controller that activated a  $\text{KHCO}_3$  base  
131 pump to keep the pH stable at 7.

## 132 **2.2. Bioreactor monitoring: total suspended solids, paracetamol concentration, DNA, and** 133 **RNA sequencing**

134 Total suspended solids (TSS) were regularly measured by passing 30 mL of the sample through a 0.45  $\mu\text{m}$   
135 pore size glass-fiber filter which was dried overnight at 105 °C. Samples (2 mL) were taken regularly from  
136 the bioreactor in triplicates, centrifuged, and stored at -20 °C (both supernatant and pellet) until APAP and  
137 DNA analysis. APAP was measured in the supernatant using an HPLC-UV (Agilent Technologies 1000  
138 series, injection volume of 100  $\mu\text{L}$ ; a mobile phase of acetate 1%: methanol (9:1); flow rate 1200  $\mu\text{L}/\text{min}$ ; and  
139 a C18 reverse-phase column: LiChrospher® 100 RP-18 (5  $\mu\text{m}$ ) LiChroCART® 125-4, 12.5 cm  $\times$  4 mm,  
140 Merck, Darmstadt, Germany). DNA was extracted from the pellets using the DNeasy PowerSoil Kit (Qiagen  
141 Benelux B.V.) following manufacturer's instructions. The samples were submitted to Macrogen (Seoul,  
142 South Korea) for amplicon sequencing of the V3 and V4 regions of the bacterial 16S rRNA gene (primers  
143 Bac341F and Bac785R (Klindworth et al., 2013)) using an Illumina MiSeq. Six samples of 30 mL were  
144 taken at day 77 (two weeks after SRT was set to 10 d and the bioreactor was in a steady state). Three samples  
145 were centrifuged and stored at -20 °C for DNA sequencing and the other three were frozen in liquid nitrogen  
146 and stored at -80 °C for RNA sequencing. DNA was extracted using the DNeasy PowerSoil Kit (Qiagen  
147 Benelux B.V.) and sequenced at BaseClear (Leiden, The Netherlands). RNA was extracted using the RNeasy  
148 PowerSoil Total RNA Kit (Qiagen Benelux B.V.) with an extra DNase treatment from Ribopure™ Kit  
149 (Thermo Fisher Scientific, Waltham, MA USA). Ribosomal RNA was removed using the Microbexpress kit  
150 (Life Technologies, Carlsbad, USA) and rRNA depleted samples were submitted to Macrogen (Seoul, South  
151 Korea) for sequencing. DNA and RNA samples were sequenced using Illumina Novaseq technology. All  
152 DNA and RNA quantities were determined using the Qubit dsDNA/RNA HS Assay Kit (Thermo Fisher  
153 Scientific, Waltham, MA USA) and a Qubit fluorometer (Thermo Fisher Scientific, Waltham, MA USA).  
154 Furthermore, DNA and RNA quality was checked with the Agilent 2100 Bioanalyzer and the High  
155 sensitivity DNA/RNA kit (Agilent, Santa Clara, USA).

### 156 **2.3. Isolation and DNA/RNA sequencing of bacteria growing on paracetamol**

157 We performed serial dilutions of the bioreactor biomass in synthetic medium (same as the bioreactor) with  
158 APAP as sole carbon source (0.2-0.4 g/L). The biomass of the most highly diluted culture displaying APAP  
159 biodegradation was plated on agar-solidified (1.5%) medium with APAP as sole carbon source. Two  
160 different colonies designed Pfast and Pslow were picked and inoculated in new bottles containing synthetic  
161 bioreactor medium (APAP sole carbon source). One milliliter of these cultures was used as inoculum for  
162 triplicate-bottle experiments where APAP biodegradation kinetics were measured and the DNA and RNA of  
163 the bacteria were sequenced. DNA and RNA from both isolates were extracted as described above, except  
164 for the Pfast DNA extraction for ONT sequencing, which was performed at Baseclear with the Wizard HMW  
165 DNA Extraction kit (Promega Benelux B.V., Leiden, The Netherlands). The genome of the fast-growing  
166 isolate Pfast was sequenced using Illumina Novaseq and ONT GridiON at Baseclear (Leiden, The  
167 Netherlands). RNA of this isolate was sequenced using Illumina Novaseq, also at Baseclear. Only one of the  
168 3 RNA samples could be sequenced. The genome and transcriptome of the slow-growing isolate Pslow were  
169 sequenced using an in-house Illumina MiSeq. For DNA library preparation the Nextera XT kit was used and  
170 for transcriptomic library preparation, the TruSeq Stranded mRNA kit was used according to the  
171 manufacturer's instructions (Illumina, San Diego, USA). All DNA and RNA quantifications and quality  
172 checks were performed as described above (Qubit and Bioanalyzer). For genomic DNA libraries, 300 bp  
173 paired-end sequencing was performed and for the transcriptomes, 150 bp single-read sequencing was done,  
174 using the Illumina Miseq sequencing machine (Illumina, San Diego, California). The raw sequence data and  
175 metadata of the bioreactor and isolates have been deposited at the read sequence archive (SRA) database of  
176 the NCBI under the BioProject ID PRJNA831879.

### 177 **2.4. Bioinformatic analysis**

#### 178 **2.4.1. 16S rRNA gene sequencing data analysis**

179 Analysis of the 16S rRNA sequencing output files was performed within R version 3.4.1 (Team, 2013) using  
180 the DADA2 pipeline (Callahan et al., 2016). Taxonomic assignment of the reads was up to the species level  
181 when possible using the Silva non-redundant database version 128 (Yilmaz et al., 2014). Count data were  
182 normalized to relative abundances. Data visualization and analysis were performed using phyloseq and

183 ggplot packages (McMurdie and Holmes, 2013; Wickham and Wickham, 2007). Chao1, Simpson and  
184 Shannon diversity indices were calculated using the estimate richness function of the phyloseq package.

#### 185 **2.4.2. DNA assembly, binning, and annotation**

186 The quality of the metagenome sequencing data was assessed using FASTQC before and after quality  
187 processing. Quality-trimming, adapter removal and contaminant filtering of Illumina paired-end sequencing  
188 reads was performed using BBDuk (BBTools, DOE Joint Genome Institute, Lawrence Berkeley National  
189 Laboratory, USA). The DNA trimmed reads were assembled using MetaSpades and aligned to the assembly  
190 using BMap to generate coverage information (Nurk et al., 2017). The assemblies were binned using  
191 different binning algorithms (BinSanity, CONCOCT, MaxBin 2.0, and MetaBAT 2) (Alneberg et al., 2014;  
192 Graham et al., 2017; Kang et al., 2019; Wu et al., 2015). DAS Tool was used for consensus binning (Sieber  
193 et al., 2018). GTDB-Tk was used to assign taxonomy and CheckM was used to assess the quality of the bins  
194 or metagenome-assembled genomes (MAGs) (Chaumeil et al., 2019; Parks et al., 2015). Annotation was  
195 performed by Metascan (Cremers et al. under revision). The annotation method was described previously by  
196 't Zandt et al. and Poghosyan et al. (in 't Zandt et al., 2020; Poghosyan et al., 2020). Briefly, genes were  
197 called by Prodigal (Hyatt et al., 2010) and subsequent open reading frames were annotated with HMMER  
198 (Eddy, 2009) and a set of custom-made databases.

199 DNA sequencing data from the slow-growing isolate Pslow were quality-checked and trimmed with BBDuk,  
200 assembled with MetaSpades and annotated with Metascan. The DNA sample consisted of two genomes (a  
201 very minor contaminant) so we separated the contigs using Maxbin 2.0. (Wu et al., 2015).

202 DNA Illumina reads from the fast-growing isolate Pfast were quality controlled and trimmed using BBduk  
203 with minimum trim quality of 18 and length of 100. ONT reads were filtered to a minimum length of 3000  
204 using BBtools utilities, and then were quality controlled and trimmed using Porechop  
205 (<https://github.com/rrwick/Porechop>) with minimum split read size of 3000. Illumina and ONT quality-  
206 trimmed reads were assembled using Unicycler with a minimum length of 1000 in the resulting. Metascan  
207 was used for annotation. Completion and contamination scores of the Pslow and Pfast assemblies were  
208 estimated using CheckM's lineage workflow. The whole-genome phylogenetic position of both assemblies  
209 was inferred using GTDB-tk. If not specified, settings were default.

210



### 211           **2.4.3.           Transcriptome analysis**

212   The RNA reads were trimmed using Sickle and mapped with BMap (allowing 1% mismatch, BBtools) to  
213   the protein-coding genes of each isolate or to the contigs of the whole metagenome. Then, transcripts per  
214   million (TPM) were calculated in Excel for each gene in each sample: first, reads per kilobase were  
215   calculated (read counts divided by the length of each gene in kilobases); second, the “per million” scaling  
216   factor was calculated (sum of all the reads per kilobase in one sample divided by one million); and third,  
217   TPM were calculated (reads per kilobase of each gene divided by the “per million” scaling factor).  
218   Approximately, the top 10% most highly expressed genes in each microorganism or bin were considered as  
219   “highly-expressed”. The RNA coverage of each bin in the metagenome was calculated or defined as the  
220   number of bases mapped to the set of protein-coding genes from each bin divided by the total number of  
221   bases in each bin. Amidase sequences were retrieved by searching for “amidase”, “amidohydrolase”, and  
222   “amidotransferase” terms in the annotated metagenome. The highly-expressed and uncharacterized amidase  
223   sequences were aligned with Clustal Omega (Higgins and Sharp, 1988) and MUSCLE (Edgar, 2004) and the  
224   phylogenetic trees were created with MEGA7 (Kumar et al., 2016) and MEGA11 (Tamura et al., 2021) using  
225   the maximum likelihood algorithm (Jones et al., 1992) and bootstrap analysis or the neighbor-joining method  
226   to analyse the tree topology (Saitou and Nei, 1987).

227

## 228           **3.   RESULTS AND DISCUSSION**

### 229           **3.1. Bioreactor performance and bacterial community changes**

230   A bioreactor was inoculated with sludge from a WWTP treating hospital waste. APAP was added as the sole  
231   carbon source at all times during the experiment and it was fully degraded since the beginning without lag  
232   phase. No transformation products were detected. The microbial community was very diverse and changed  
233   during the different operational settings (Figure 1). In the first start-up phase, the total suspended solids  
234   (TSS) gradually increased to about 1.1 g/L as all biomass was retained in the bioreactor via a membrane  
235   module. The HRT was 1.8 days. Under these conditions, the microbial community was dominated by  
236   members of the families *Chitinophagaceae*, *Haliangiaceae*, *Phycisphaeraceae*, *Pseudomonadaceae*,  
237   *Saccharimonadaceae*, and *Sphingobacteriaceae* when compared to the inoculum mix. In the second phase, a

238 SRT of 10 days was maintained in order to keep the biomass concentration (TSS) stable at a steady state.  
 239 This led to a decrease of the relative abundance of *Pseudomonadaceae*, *Phycisphaeraceae*, and  
 240 *Sphingobacteriaceae* while increasing *Burkholderiaceae*, *Chitinophagaceae*, and *Polyangiaceae*. In the third  
 241 phase, the HRT was increased from 1.8 to 3.7 days resulting in a bacterial community dominated by the  
 242 heterotrophic bacteria *Blastocatellaceae*, *Burkholderiaceae*, and *Chitinophagaceae*. *Nitrospiraceae* were  
 243 also enriched which might be the result of growth on low concentration of residual ammonium in the reactor.  
 244 Overall, the alpha diversity (richness and evenness of species) decreased over time in the bioreactor which  
 245 corresponds to a selection and enrichment process (Figure S1). The previously mentioned taxa are normally  
 246 found in WWTPs due to their ability to degrade organic matter or ammonium/nitrite (*Nitrospira*) (Morin et  
 247 al., 2020; Saunders et al., 2016). The presence of heterotrophs able to degrade complex organic matter (i.e.  
 248 *Chitinophagaceae* and *Polyangiaceae*) might indicate possible predation and biomass recycling in the  
 249 bioreactor (Petters et al., 2021). Furthermore, members of the *Pseudomonadaceae* and *Burkholderiaceae*  
 250 families have been reported to degrade APAP and 4-AP, respectively (Park and Oh, 2020a; Takenaka et al.,  
 251 2003; Žur et al., 2018a).

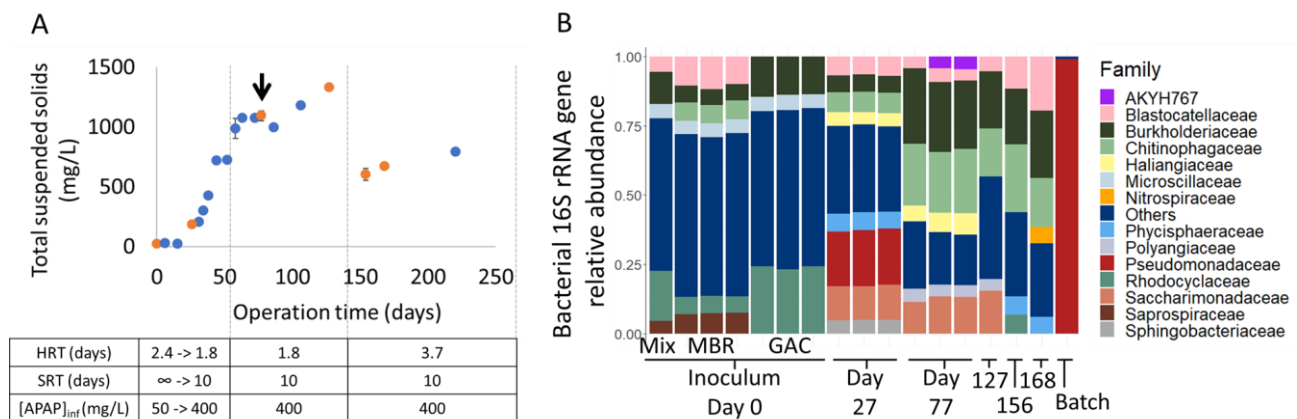

252  
 253 **Figure 1. A:** Total suspended solids in mg/L. Orange dots represent the time points when 16S rRNA genes  
 254 were sequenced. The black arrow represents the time point when whole-genome and transcriptome  
 255 sequencing occurred. **B:** relative abundance of bacterial 16S rRNA genes in the inoculum and the  
 256 bioreactor at several time points. Batch sample represents the serial dilution of the bioreactor biomass in  
 257 medium containing 400 mg/L of APAP. Abbreviations: HRT, hydraulic retention time; SRT, solid retention  
 258 time; APAP, paracetamol; MBR, membrane bioreactor; GAC, granular activated carbon; Mix, mixture of  
 259 MBR and GAC.

260 **3.2. Recovery of metagenome-assembled genomes from the bioreactor**

261 Fourteen MAGs were recovered from the bioreactor metagenome and approximately 30% of the total reads  
 262 remained unbinned. Table 1 shows the 14 recovered MAGs ordered from highest to lowest coverage based  
 263 on RNA sequencing data (calculated with RNA bases mapped to protein-coding genes). *Chitinophagaceae*  
 264 and *Myxococcales* were the most active (RNA coverage) bacteria and also the most abundant (DNA  
 265 coverage) together with *Microbacterium* and *Patescibacteria*. Despite the high abundance of the  
 266 *Patescibacteria* MAG, it had low completeness. The reason for this might be that the single copy genes  
 267 normally used to calculate completeness are often not detected in *Patescibacteria* genomes (Brown et al.,  
 268 2015). *Pseudomonas* spp. were low abundant in the metagenome and only present in the unbinned reads.

269  
 270 **Table 1. Metagenome-assembled genomes (MAGs) from the bioreactor at day 77.** CheckM was used to  
 271 check the quality of the MAGs. Taxonomy was assigned until the highest level possible using GTDB-Tk.  
 272 RNA coverage is the average of three replicate samples while DNA coverage is based on one sample.

| MAG<br>(metaspades + das_tool)                          | Completeness<br>(%) | Contamination<br>(%) | Strain<br>heterogeneity | Genome<br>size (Mbp) | DNA<br>coverage | RNA<br>coverage<br>± SD |
|---------------------------------------------------------|---------------------|----------------------|-------------------------|----------------------|-----------------|-------------------------|
| <i>Chitinophagaceae_2</i> ;<br><i>g_Niabella</i>        | 98.2                | 0.7                  | 0.0                     | 3.4                  | 51.4            | <b>15.5 ± 4.2</b>       |
| <i>Myxococcales_1</i> ;<br><i>g_Haliangium</i>          | 87.1                | 3.3                  | 0.0                     | 7.5                  | 21.3            | <b>15.3 ± 5.5</b>       |
| <i>Bacteroidetes</i> ;<br><i>f_Sphingobacteriaceae</i>  | 98.7                | 1.0                  | 100.0                   | 3.2                  | 9.7             | <b>5.4 ± 1.8</b>        |
| <i>Chitinophagaceae_1</i> ;<br><i>g_Niastella</i>       | 98.3                | 2.7                  | 77.8                    | 3.0                  | 10.7            | <b>3.7 ± 1.2</b>        |
| <i>Patescibacteria</i> ;<br><i>f_Saccharimonadaceae</i> | 66.4                | 3.4                  | 20.0                    | 1.1                  | 26.7            | <b>3.3 ± 0.2</b>        |
| <i>Microbacterium</i>                                   | 100.0               | 0.0                  | 0.0                     | 3.5                  | 27.0            | <b>2.8 ± 1.1</b>        |

|                                                        |      |      |      |      |      |                  |
|--------------------------------------------------------|------|------|------|------|------|------------------|
| <i>Acidobacteria</i>                                   | 97.4 | 3.7  | 0.0  | 4.7  | 11.1 | <b>2.1 ± 0.4</b> |
| <i>Rubrivivax</i>                                      | 80.2 | 40.0 | 12.4 | 6.4  | 7.1  | <b>1.6 ± 0.5</b> |
| <i>Myxococcales_2;</i><br><i>g_Haliangium</i>          | 77.4 | 6.3  | 30   | 10.3 | 8.1  | <b>1.4 ± 0.3</b> |
| <i>Alicyclophilus denitrificans</i>                    | 98.1 | 1.6  | 69.2 | 4.8  | 16.6 | <b>1.4 ± 0.4</b> |
| <i>Chitinophagaceae_3;</i><br><i>g_Niabella</i>        | 76.1 | 1    | 20   | 3.1  | 4.6  | <b>1.3 ± 0.4</b> |
| <i>Betaproteobacteria;</i><br><i>o_Burkholderiales</i> | 95.7 | 11.4 | 75.0 | 4.9  | 20.1 | <b>1.1 ± 0.3</b> |
| <i>Actinomycetales;</i><br><i>g_Nocardioides</i>       | 54.8 | 2.3  | 0    | 2.0  | 4.5  | <b>0.8 ± 0.5</b> |
| <i>Comamonadaceae</i>                                  | 52.0 | 4.01 | 20   | 3.6  | 4.7  | <b>0.6 ± 0.2</b> |

273

### 274 **3.3. Paracetamol degradation by two *Pseudomonas* spp. isolates**

275 After serial dilutions of the bioreactor biomass, and plating the highest dilution showing growth on agar  
 276 mineral medium with APAP as sole carbon source, two *Pseudomonas* spp. were obtained (Figure 1B (Batch)  
 277 and Figure 2). *Pseudomonas* sp. Pfast degraded 200 mg/L APAP in 10 h and converted it into 4-AP, which  
 278 precipitated in the medium as a dark-brown solid. 4-AP might also be degraded by the Pfast isolate much  
 279 slower than APAP. HQ was also detected as an intermediate but in a much lower concentration than 4-AP  
 280 (data not shown). The other *Pseudomonas* sp., Pslow, degraded 200 mg/L APAP in approximately 90 d  
 281 without the accumulation of aromatic transformation products. Previous studies showed that other  
 282 *Pseudomonas* spp. are also able to degrade APAP in a few hours (De Gusseme et al., 2011; Hu et al., 2013;  
 283 Park and Oh, 2020a; Zhang et al., 2013; Žur et al., 2018a). However, we are not aware of reports describing  
 284 bacteria that degrade APAP at low rates.

285

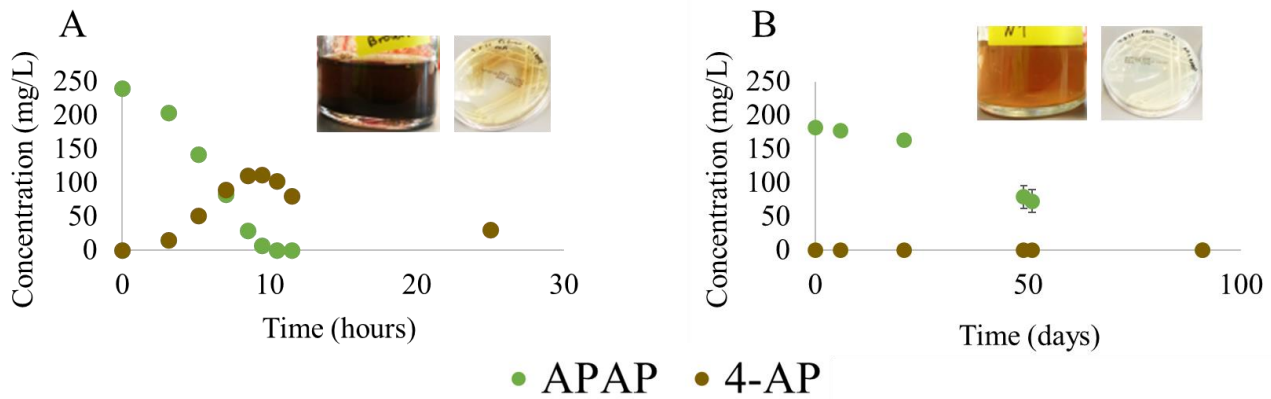

286

287 **Figure 2.** APAP biodegradation rates of two *Pseudomonas* spp. isolated from the bioreactor by serial  
288 dilutions and plating. **A** corresponds to the fast-growing *Pseudomonas* sp. *Pfast* and **B** to the slow-growing  
289 *Pseudomonas* sp. *Pslow*. Abbreviations: APAP, paracetamol; 4-AP, 4-aminophenol.

290

#### 291 3.4. Highly-expressed amidases in the two *Pseudomonas* spp. isolates

292 After DNA and RNA sequencing, a highly expressed gene cluster was identified in the *Pfast* isolate that  
293 contained a putative amide transporter (AmiS/UreI family, OACKLNDA\_05759) and an amidase-like  
294 protein (OACKLNDA\_05760) with 85% sequence identity to an aryl acylamidase known to convert APAP  
295 into 4-AP and acetate (Ko et al., 2010; Lee et al., 2015). The transporter might be catalyzing the uptake of  
296 APAP or the excretion of 4-AP. The genome of the *Pslow* isolate contained neither this amidase nor the  
297 putative amide transporter. Instead, it encoded three other amidases with  $\geq 95\%$  query coverage and 28-31%  
298 identity to the *Pfast* amidase. The most similar amidase (31% identity, BKDBLJDL\_05334) was  
299 upregulated in the transcriptome of strain *Pslow* cultivated with APAP as the sole carbon source. This  
300 amidase was encoded in a gene cluster together with a gene for a zinc-dependent hydrolase  
301 (BKDBLJDL\_05335). Interestingly, these genes were also present in the fast-growing *Pseudomonas* isolate,  
302 but not highly expressed. The difference in APAP biodegradation rate and consequently, growth between  
303 both *Pseudomonas* spp. was most likely related to the presence of OACKLNDA\_05760 amidase in *Pfast*,  
304 which might be able to transform APAP to 4-AP at high rates. Another option could be that the putative  
305 amide transporter OACKLNDA\_05759 was involved in a faster uptake of APAP and thus, transformation  
306 into 4-AP. Further studies are needed to answer this question.

307 The highly expressed amidase gene of strain *Pslow* was present in the chromosome of numerous

308 *Pseudomonas* species registered in the NCBI nucleotide collection. However, the highly expressed amidase  
309 gene from strain Pfast was only found in a few microorganisms that came from various locations around the  
310 world (Australia, China, Pakistan, India, Korea, India, Poland): in the plasmid of multi-drug resistant  
311 *Acinetobacter* spp. isolated from patients and hospitals (Ghaly et al., 2020; Kizny Gordon et al., 2020; Zou et  
312 al., 2017); and in the chromosome of *Pseudomonas* and *Burkholderia* spp. isolated from soil, activated  
313 sludge, and hospitals (D'Souza et al., 2019; Ko et al., 2010; Patil et al., 2017; Žur et al., 2018b). Many  
314 bacteria contained a similar AmiS/UreI family transporter gene next to the amidase gene and different  
315 mobile genetic elements nearby (Tn3 transposons, IS630 insertion sequences and IntI1 integrases). Our  
316 strain, Pfast, also had two insertion sequences (IS6100 and IS21, OACKLNDA\_05756,  
317 OACKLNDA\_05781), one Tn3 transposase gene (OACKLNDA\_05752), and one recombinase gene  
318 (OACKLNDA\_05755) near the highly-expressed amidase gene. Consequently, the whole gene cluster might  
319 have been exchanged between different species via horizontal gene transfer (HGT) (Rios Miguel et al.,  
320 2020). Finally, the low number of homologous proteins in the NCBI database might indicate the recent  
321 evolution of this amidase towards paracetamol biodegradation or our limited ability to find and identify these  
322 genes.

### 323 **3.5. Amidase diversity in the metagenome**

324 To check and confirm whether the metagenome contained more unidentified amidases involved in APAP and  
325 intermediate conversion, we analyzed the total metagenome in more detail. The highest BLAST identity  
326 match of the Pfast amidase was 50% for proteins encoded on the unbinned contigs. The 14 MAGs only  
327 contained amidases with a maximum of 30% sequence identity. For the Pslow isolate, the highest match was  
328 50% for proteins encoded on the unbinned contigs as well as the *Rubrivivax* and *Betaproteobacteria* MAGs.  
329 Since the APAP concentration was below the detection limit (~0.2 mg/L) in the bioreactor, but continuously  
330 supplied with the medium inflow, uncharacterized amidases might be responsible for APAP biodegradation  
331 at low concentrations in the bioreactor.

332 A phylogenetic tree was created with the top 150 most expressed amidases in the metagenome, the  
333 uncharacterized amidases (enzymes annotated as “amidase” and whose function is not known) present in  
334 both *Pseudomonas* isolates, and five amidases known to degrade APAP obtained from literature and  
335 databases (Supplementary Figure S2, Supplementary Table S1). All the uncharacterized amidases from the

336 metagenome and the *Pseudomonas* isolate genomes clustered together (green cluster in Supplementary  
337 Figure S2), including four amidases known to degrade paracetamol (Ko et al., 2010; Lee et al., 2015; Yun et  
338 al., 2017; Zhang et al., 2012; Zhang et al., 2020; Zhang et al., 2019). This group belongs to the Amidase  
339 Signature (AS) enzyme family [EC:3.5.1.4] characterized by a highly conserved signature region of  
340 approximately 160 amino acids that includes a canonical catalytic triad (Ser-*cis*Ser-Lys) and a Gly/Ser-rich  
341 motif (GGSS[GS]G). One amidase (AGC74206.1 dimethoate hydrolase DmhA), previously reported to  
342 degrade APAP (Chen et al., 2016), did not cluster in this group (Supplementary Figure S2). Consequently,  
343 there is the possibility that other amidase families are also able to transform APAP. For instance, a histone  
344 deacetylase-like amidohydrolase clustered together with the APAP-degrading amidase DmhA, suggesting its  
345 reactivity towards APAP.

346 The green AS amidase cluster of the phylogenetic tree in Supplementary Figure S2 was analyzed in more  
347 detail (Figure 3). The amidase gene expression level in each bin/MAG was added to the tree (i.e. top 10%)  
348 and the amino acid sequences were manually blasted against the NCBI non-redundant protein database to  
349 improve the annotation. Furthermore, partial sequences like one highly-expressed amidase gene from  
350 *Betaproteobacteria* (EAEDEFLN\_03924) were removed from the analysis. Twelve amidases were identified  
351 as “Asp-tRNA(Asn)/Glu-tRNA(Gln) amidotransferase subunit GatA” and they all clustered together (green  
352 cluster in Figure 3). This type of amidase is involved in the transformation of Glu-tRNA<sup>Gln</sup> to Gln-tRNA<sup>Gln</sup>  
353 for the synthesis of proteins. Gene duplication and mutation events in this amidotransferase were probably  
354 the key contributors to the high number of uncharacterized amidases with broad substrate specificity.

355 Another cluster, with low bootstrap support, in the phylogenetic tree of Figure 3 contained highly-expressed  
356 amidases (top 10%) of the *Pseudomonas* genomes and the *Microbacterium* MAG (red amidases in Figure 3,  
357 OACKLNDA\_05760, BKDBLJDL\_05334, BJLACCKG\_02946). The *Microbacterium* amidase only had  
358 91% query coverage and 63% identity to the closest amidase in the NCBI non-redundant protein database.  
359 This means that this amidase was sequenced for the first time and thus, the evolution of amidases towards  
360 paracetamol biodegradation might be an ongoing process. The *Microbacterium* amidase was part of a highly-  
361 expressed gene cluster containing a flavin reductase (BJLACCKG\_02944), an arylformamidase  
362 (BJLACCKG\_02945), a branched-chain amino acid ABC transporter (BJLACCKG\_02947,  
363 BJLACCKG\_02948, BJLACCKG\_02949, BJLACCKG\_02950, BJLACCKG\_02951), and one

364 oxidoreductase (BJLACCKG\_02952). Furthermore, an *IS110* family transposase gene  
365 (BJLACCKG\_02943) was right next to this highly expressed gene cluster. Four amidases known to degrade  
366 APAP were also part of the phylogenetic tree cluster containing the highly-expressed amidases of the  
367 *Pseudomonas* genomes and *Microbacterium* MAG (ANS81375.1 arylamidase Mah, ACP39716.2 aryl  
368 acylamidase, ANB41810.1 tricocarbon amidase TccA, AFC37599.1 aryl-amidase A AmpA; blue amidases in  
369 Figure 3). Three amidase genes present on the unbinned contigs were highly expressed in relation to all the  
370 unbinned protein-coding genes (top 10%, orange amidases in Figure 3). They were affiliated with  
371 *Actinomycetia* and *Comamonadaceae* spp. (KGEKGGEOM\_07080, KGEKGGEOM\_08489,  
372 KGEKGGEOM\_08132) and might also be degrading APAP in the bioreactor. Non-highly-expressed amidase  
373 genes might also have the potential to degrade APAP even though their genes were not strongly regulated  
374 when APAP was present. For instance, the non-highly-expressed amidase OACKLNDA\_00714 of the Pfast  
375 strain was identical to the highly-expressed amidase BKDBLJDL\_05334 of the Pslow strain, so it had the  
376 potential to degrade APAP at slow rates but it was not highly-expressed in Pfast.

377 Finally, a multiple sequence alignment was performed with the amidases known to degrade APAP (except  
378 for DmhA which is not part of the AS family) and the highly expressed amidases from the *Pseudomonas*  
379 genomes and the metagenome (Supplementary File 2). Lee et al. previously determined the three-  
380 dimensional structure of the amidase ACP39716.2 with APAP as a substrate (Lee et al., 2015). They  
381 revealed several residues involved in catalysis and APAP binding that we investigated in our alignment. The  
382 aligned amidases contained a conserved catalytic triad (Ser<sup>187</sup>-*cis*Ser<sup>163</sup>-Lys<sup>84</sup>, highlighted in green), Gly/Ser-  
383 rich motif (GGSSGG, in bold) and oxyanion hole ([G]GGS, in bold). The substrate-binding pocket contained  
384 two loop regions (highlighted in fair and dark grey) and one  $\alpha$ -helix (highlighted in blue) that were less  
385 conserved. In the crystal structure of ACP39716, another two residues (Tyr<sup>136</sup> and Thr<sup>330</sup>, highlighted in  
386 yellow) were described to bind to the hydroxyl group at the para-position in APAP via hydrogen bonds with  
387 two water molecules. However, Thr<sup>330</sup> was only present in approximately half of the aligned amidase  
388 sequences and Tyr<sup>136</sup> was not present in any of them. Thus, the amidases from this study might have different  
389 substrate specificities compared to the ACP39716.2 amidase. Furthermore, we conclude that Tyr<sup>136</sup> and  
390 Thr<sup>330</sup> are not strictly necessary for APAP binding and degradation.

391



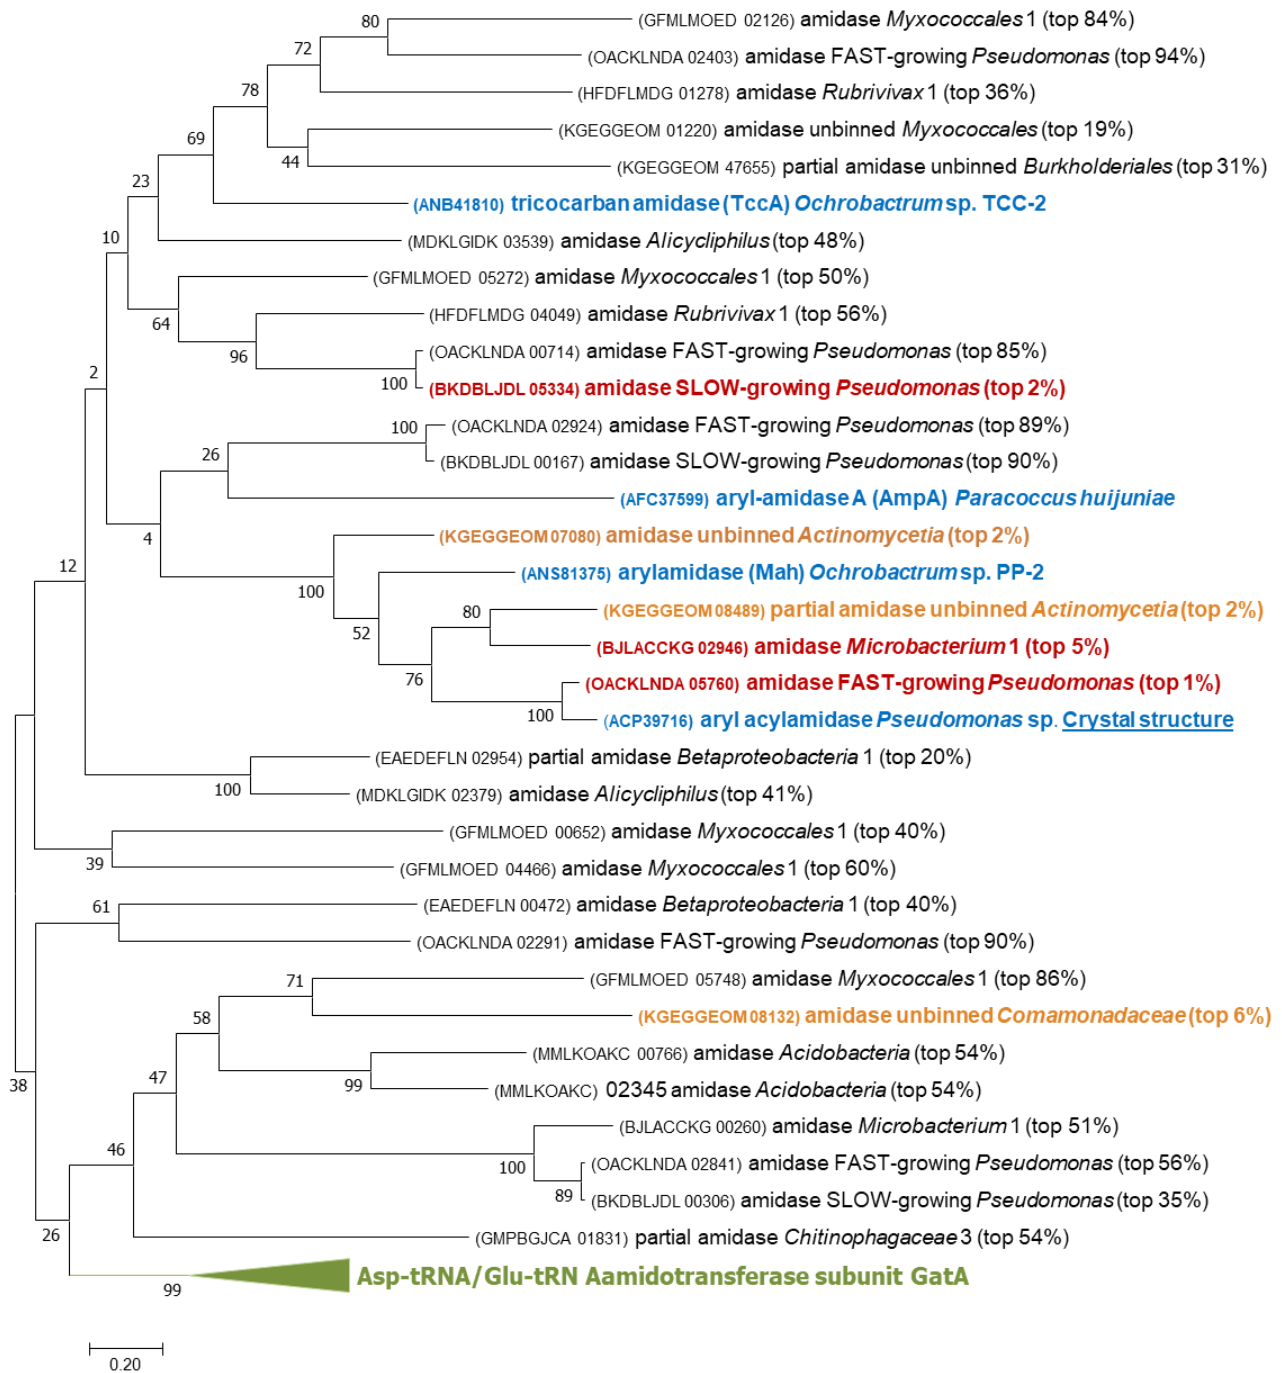

392

393 **Figure 3.** Phylogenetic tree of the Amidase Signature (AS) enzyme family [EC:3.5.1.4] proteins in the  
 394 bioreactor and the *Pseudomonas* isolates. The evolutionary history was inferred by using the Maximum  
 395 Likelihood method (Jones et al., 1992). The tree with the highest log likelihood (-25739.55) is shown after  
 396 bootstrapping 500 times. The percentage of trees in which the associated taxa clustered together is shown  
 397 next to the branches. Evolutionary analyses were conducted in MEGA7 (Kumar et al., 2016). Amidases in  
 398 blue are experimentally validated to degrade APAP. Amidases in red are the ones whose expression lies in  
 399 the top 10% of all the genes in the *Pseudomonas* isolate transcriptomes, and the metatranscriptomes of the

400 *bioreactor mapping to a metagenome-assembled genome in this study. Orange amidases correspond to the*  
401 *amidase genes lying in the top 10% most expressed from the unbinned protein-coding genes. The green*  
402 *cluster corresponds to amidases annotated as the Asp-tRNA(Asn)/Glu-tRNA(Gln) amidotransferase subunit*  
403 *GatA.*

404

### 405 **3.6. Paracetamol-degradation pathway: highly-expressed gene candidates**

406 The first step in APAP biodegradation is the cleavage of the amide bond by an amidase to produce 4-AP and  
407 acetate (**Figure 4**). In each *Pseudomonas* genome, a different highly expressed amidase was identified  
408 presumably performing this cleavage (OACKLNDA\_05760, BKDBLJDL\_05334). In the bioreactor  
409 metagenome, the *Microbacterium* MAG was the only one with a highly expressed amidase inside the AS  
410 family cluster (BJLACCKG\_02946), from which four amidases were previously reported to degrade APAP  
411 (**Figure 3**). The *Betaproteobacteria* MAG also had a highly expressed uncharacterized amidase gene  
412 (EADEFNLN\_03924). However, the nucleotide sequence was partial so we could not check its classification.  
413 Therefore, *Microbacterium* (and *Betaproteobacteria*) might have been involved in transforming APAP into  
414 4-AP together with some low abundant bacteria in the unbinned group.

415 The enzyme deaminating 4-AP is still unknown and we did not find an obvious gene responsible for this  
416 reaction. Uncharacterized RidA family protein genes were highly expressed in the two *Pseudomonas*  
417 genomes and in the *Microbacterium* and *Betaproteobacteria* MAGs (OACKLNDA\_05815,  
418 OACKLNDA\_03065, BKDBLJDL\_03266, BKDBLJDL\_01320, BJLACCKG\_02940, BJLACCKG\_02936,  
419 EADEFNLN\_02051). Therefore, these proteins might have been involved in deaminating 4-AP or  
420 deaminating the aminomuconate intermediates after ring cleavage (He and Spain, 1998). Furthermore, two  
421 ammonia-lyase genes were highly expressed in the genome of the Pslow strain: aspartate ammonia-lyase and  
422 ethanolamine ammonia-lyase (BKDBLJDL\_01355, BKDBLJDL\_02838). However, these genes were not  
423 highly expressed in the Pfast genome and the metagenome from the bioreactor.

424 The investigated bacteria did not use any known hydroquinone 1,2-dioxygenase, which is a type III ring-  
425 cleaving extradiol dioxygenase (cupin superfamily) with a catalytic mechanism analogous to that of the  
426 extradiol-type dioxygenases. Instead, the up-regulated type III extradiol dioxygenase genes present in  
427 bioreactor MAGs (*Chitinophagaceae\_1,2* and *Betaproteobacteria*: 3-hydroxyanthranilate 3,4-dioxygenase

428 (NLCKOFOF\_01117, JPNLMFAJ\_02227, EAEDFLN\_00964); *Bacteroidetes*, *Rubrivivax*, and  
429 *Myxococcales\_2*: homogentisate 1,2-dioxygenase (KGEBAGMN\_02738, HFDFLMDG\_05905,  
430 OPIJCCOK\_08966)) might have cleaved the aromatic ring of HQ to produce 4-hydroxymuconic  
431 semialdehyde as previously described (Žur et al., 2018b) (**Figure 4**). Homogentisate 1,2-dioxygenase and 3-  
432 hydroxyanthranilate 3,4-dioxygenase are type III extradiol dioxygenases able to cleave the aromatic ring of  
433 non-catecholic substrates, which are characterized by not having vicinal diols. For example, (homo)gentisate  
434 and hydroquinone have two hydroxyl groups in *para* position and 3-hydroxyanthranilate has one hydroxyl,  
435 one amino, and one carboxylic acid group as ring substituents. These two dioxygenases are involved in the  
436 degradation of aromatic amino acids. Therefore, bacteria might use the side activities of existing enzymes to  
437 degrade aromatic micropollutants such as APAP.

438 The ring cleavage of aromatic compounds containing hydroxyl and amino substituents (i.e. 2-aminophenol,  
439 3-hydroxyanthranilate, and 5-aminosalicylate) has been previously reported (Hintner et al., 2004; Li de et al.,  
440 2013; Takenaka et al., 1997; Wang et al., 2020). Therefore, the aromatic ring of 4-AP might also be cleaved  
441 before deamination by class III ring-cleaving dioxygenases. However, metabolites confirming this pathway  
442 have not yet been measured.

443 An alternative route for the direct ring cleavage of HQ is the hydroxylation of HQ to form hydroxyquinol  
444 (1,2,4-trihydroxybenzene) and later, the ring cleavage of hydroxyquinol by an intradiol-type dioxygenase  
445 (Ferraroni et al., 2005; Takenaka et al., 2003) or an extradiol-type dioxygenase, probably from the vicinal  
446 oxygen chelate (VOC) or type I superfamily (Murakami et al., 1999) (**Figure 4**). The hydroxylation of HQ  
447 can be performed by ring-hydroxylating dioxygenases or monooxygenases. In the Pfast isolate genome, an  
448 uncharacterized ring-hydroxylating dioxygenase (OACKLNDA\_03401) and an intradiol catechol 1,2-  
449 dioxygenase (OACKLNDA\_05722) were highly expressed. Furthermore, two uncharacterized extradiol-type  
450 dioxygenases were highly expressed in both *Pseudomonas* isolate genomes (OACKLNDA\_01459,  
451 BKDBLJDL\_01807). These dioxygenases were similar to 4,5-DOPA dioxygenase, which is part of the VOC  
452 extradiol dioxygenases (Wang et al., 2019). In the bioreactor, the *Rubrivivax* MAG had a phenol hydroxylase  
453 (HFDFLMDG\_03468, HFDFLMDG\_03467, HFDFLMDG\_03466), an uncharacterized ring-hydroxylating  
454 dioxygenase (HFDFLMDG\_03024), a 4-hydroxybenzoate 3-monooxygenase (HFDFLMDG\_05635), and a  
455 extradiol protocatechuate 4,5-dioxygenase (HFDFLMDG\_01086, HFDFLMDG\_01087) highly expressed.

456 The *Microbacterium* MAG contained a highly-expressed VOC extradiol 3,4-dihydroxyphenylacetate  
457 (homoprotocatechuate) 2,3-dioxygenase involved in the degradation of tyrosine (BJLACCKG\_03009). The  
458 *Betaproteobacteria* MAG had a putative ring hydroxylating dioxygenase (EAEDEFLN\_00364), and a 4-  
459 hydroxyphenylpyruvate dioxygenase (EAEDEFLN\_02889) able to hydroxylate and decarboxylate aromatic  
460 rings in the tyrosine degradation pathway. Many other MAGs contained this gene up-regulated, i.e.  
461 *Bacteroidetes*, *Comamonadaceae* and *Myxococcales\_2* (KGE BAGMN\_02075, JMGBCLMB\_02041,  
462 OPIJCCOK\_08967). Finally, the *Alicyclophilus* MAG had a highly expressed gene cluster containing an  
463 MFS transporter (MDKLGIDK\_02282), a tripartite tricarboxylate transporter substrate binding protein  
464 (MDKLGIDK\_02283), an muconolactone D-isomerase (MDKLGIDK\_02284), an 3-oxoadipate enol-  
465 lactonase (MDKLGIDK\_02285), a 1,6-dihydroxycyclohexa-2,4-diene-1-carboxylate dehydrogenase  
466 (MDKLGIDK\_02286), an intradiol catechol 1,2-dioxygenase gene (MDKLGIDK\_02287), and a muconate  
467 cycloisomerase (MDKLGIDK\_02288). This highly-expressed gene cluster suggests the ability of  
468 *Alicyclophilus* to fully degrade hydroxyquinol via the oxoadipate pathway. Interestingly, the *Alicyclophilus*  
469 MAG had hydroquinone dioxygenase genes (MDKLGIDK\_00653, MDKLGIDK\_00654) that were not  
470 highly expressed.

471 Acetyl-CoA synthetase genes and genes encoding enzymes involved in the tricarboxylic acid (TCA) and  
472 glyoxylate cycles (isocitrate lyase) were highly expressed in the transcriptome of both *Pseudomonas* spp. and  
473 several MAGs (i.e. *Microbacterium*, *Rubrivivax*, *Alicyclophilus*, and *Actinomycetales*), thus indicating their  
474 ability to grow on acetate after cleaving the APAP amide bond or via cross-feeding from other bacteria  
475 (**Figure 4**). Finally, the highly-expressed gene encoding an uncharacterized carboxymuconolactone  
476 decarboxylase family protein could be involved in the conversion of muconolactone intermediates to  
477 eventually reach the TCA cycle for bacterial growth in the *Pseudomonas* isolates (OACKLNDA\_03472,  
478 BKDBLJDL\_01962). The *Microbacterium*, *Rubrivivax*, and *Betaproteobacteria* MAGs had highly-  
479 expressed dioxygenases but they did not have up-regulated genes belonging to the  $\beta$ -keto adipate pathway,  
480 involved in the conversion of aromatic metabolites into TCA intermediates. Therefore, it is unclear whether  
481 they were able to assimilate aromatic compounds or not. Furthermore, the *Rubrivivax* and *Alicyclophilus*  
482 MAGs did not have any highly-expressed amidase from the AS family suggesting that cross-feeding of  
483 acetate and aromatic intermediates was happening in the bioreactor.

484 The *Myxococcales* family is known for its diverse metabolism and its predatory nature, so the two bioreactor  
485 MAGs affiliated to the *Myxococcales* family might have lived from the metabolites and cellular components  
486 of decaying microorganisms (Müller et al., 2016). Similarly, the *Chitinophagaceae* family is known to  
487 degrade complex organic matter and therefore, the three bioreactor MAGs affiliated to the *Chitinophagaceae*  
488 family could also have been biomass recyclers in the bioreactor (Morin et al., 2020). The highest expressed  
489 metabolic genes of these MAGs were involved in the TCA cycle, gluconeogenesis, and metabolism of lipids,  
490 peptidoglycan, nucleotides, and amino acids, thus not providing many hints about their exact catabolism or  
491 energy source. Similarly, the metabolism of *Bacteroidetes*, *Acidobacteria*, *Actinomycetales*, and  
492 *Comamonadaceae* MAGs was ambiguous and they might also be predators or biomass recyclers. In addition,  
493 we found that type II and type IV secretion systems were highly expressed in several MAGs (i.e.  
494 *Acidobacteria*, *Comamonadaceae*) which might have been involved in predation, defense, and conjugation  
495 activities between microorganisms (Aharon et al., 2021; Sgro et al., 2019). However, some of these MAGs  
496 might also degrade APAP transformation products via their highly-expressed dioxygenases (i.e.  
497 *Chitinophagaceae\_1\_2*, *Bacteroidetes*, *Myxococcales\_2*). The *Patescibacteria* MAG mostly contained genes  
498 encoding carbohydrate degrading enzymes, so it might have thrived in symbiosis with other microbial  
499 community members that produced exopolysaccharides.

500

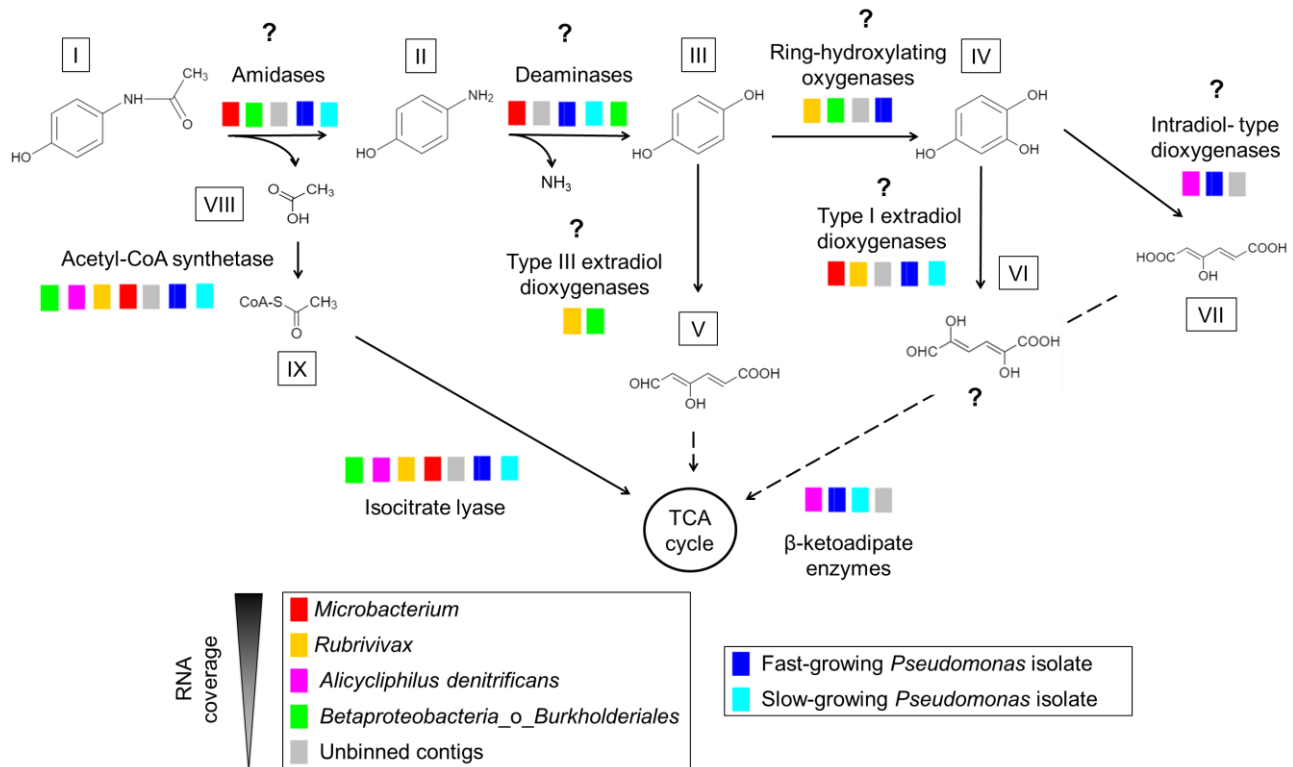

501

502 **Figure 4.** Paracetamol degradation pathway by the bioreactor microbial community and the *Pseudomonas*  
 503 isolates. The question marks represent candidate enzymes and metabolites. Dashed lines correspond to  
 504 conversions requiring more than one step. I paracetamol; II 4-aminophenol; III hydroquinone; IV  
 505 hydroxyquinol or 1,2,4-trihydroxybenzene; V 4-hydroxymuconic semialdehyde or 4-hydroxy-6-oxo-2,4-  
 506 hexadienoic acid; VI 2,5-dihydroxy-6-oxo-2,4-hexadienoic acid; VII 3-hydroxy-cis,cis-muconate or 3-  
 507 hydroxy-2,4-hexadienedioic acid; VIII acetate; IX acetyl-CoA; TCA tricarboxylic acid.

508

### 509 3.7. Highly-expressed nitrification and denitrification genes in the bioreactor

510 The majority of the MAGs, except for *Patescibacteria* and *Myxococcales\_1*, had highly expressed genes  
 511 encoding enzymes from the denitrification pathway. All four genes encoding the full pathway of  
 512 denitrification could only be found in one MAG, affiliated with *Alicyclophilus denitrificans*, as well as the in  
 513 the unbinned contigs: nitrate reductase, nitrite reductase, nitric oxide reductase, and nitrous oxide reductase.  
 514 The bioreactor was fully aerated, but biomass was spatially organized in small granules (Figure S3), so there  
 515 might have been anoxic conditions towards the inside of the granules favoring denitrification. Nitrate and  
 516 nitrite were not added to the medium, so nitrifying microorganisms were apparently also active in the

517 bioreactor. A single highly expressed ammonia monooxygenase (subunits A, B, C; KEGGGEOM\_12202,  
518 KEGGGEOM\_12201, KEGGGEOM\_12203) was encoded in the unbinned contigs, and affiliated with the  
519 complete ammonia oxidizer (comammox) *Nitrospira* sp. This finding suggests that some ammonia released  
520 from decaying biomass, from the paracetamol degradation and from the ammonia supply in the medium  
521 intended for assimilation (~1 mM) was converted into nitrate by comammox *Nitrospira* sp. and subsequently  
522 available for (oxygen-limited) denitrification.

523

## 524 **CONCLUSIONS**

525 On the basis of our cultivation and metagenomic analysis, we conclude that APAP was immediately  
526 degraded by the activated sludge of a hospital WWTP and that a diverse microbial community was enriched  
527 under low APAP concentrations in a membrane bioreactor. High APAP concentrations in batch led to the  
528 dominance of a fast-growing *Pseudomonas* species. Several uncharacterized amidases from the AS family  
529 were highly expressed in the genome of a fast- and a slow-growing *Pseudomonas* species and the bioreactor  
530 metagenome. They might be cleaving APAP into 4-AP at different rates. Genes encoding for uncharacterized  
531 RidA family proteins were highly expressed in the genome of the *Pseudomonas* isolates and several  
532 bioreactor MAGs. They are known to have deaminase activity, so they might be converting 4-AP to HQ or  
533 cleaving reactive enamine intermediates. Genes encoding for intradiol- and extradiol-type dioxygenases were  
534 highly expressed in the genomes of the *Pseudomonas* isolates and the bioreactor metagenome. Many of these  
535 genes are part of the degradation pathway of aromatic amino acids. Therefore, microorganisms might take  
536 advantage of the side activities of existing enzymes encoded in their genomes for the degradation of APAP  
537 transformation products. Candidate APAP-degrading amidases, deaminases, and dioxygenases were not  
538 combined in the same gene cluster. Highly expressed genes encoding amidases were often found in the  
539 vicinity of mobile genetic elements, which suggests that APAP-degrading amidase genes are currently being  
540 exchanged between different bacteria via HGT.

541 Taken together, these results suggest a role of uncharacterized amidases, deaminases and dioxygenases in the  
542 biodegradation of APAP and the use of cross-feeding to efficiently degrade APAP in WWTP microbial  
543 communities. Furthermore, the high number of microorganisms able to degrade APAP might be the result of

544 the broad substrate spectrum of amidases and its evolution, together with the fact that just one enzyme  
545 (amidase) is needed to grow on APAP-derived acetate. This study contributes to a better understanding of  
546 microbial evolution towards pharmaceutical biodegradation and demonstrates the complexity of this process  
547 due to the broad substrate spectrum of the involved enzymes.

548

## 549 **AUTHOR CONTRIBUTIONS**

550 ARM, MJ, HOdC, and CW contributed to the conceptual framework of the manuscript. ARM conducted the  
551 experiments and data analysis. GS, GC, and HOdC contributed to bioinformatics analyses. TvA performed  
552 DNA and RNA Illumina sequencing of the slow-growing *Pseudomonas*. ARM wrote the manuscript with  
553 input from all the authors.

554

## 555 **DATA AVAILABILITY**

556 All raw sequencing data (DNA and RNA) have been deposited at the read sequence archive (SRA) database  
557 of the NCBI under the BioProject ID PRJNA831879. The amino acid sequences and annotation of all genes  
558 in the metagenome and the *Pseudomonas* spp. genomes are deposited in Dans Easy  
559 (<https://doi.org/10.17026/dans-xwd-fbj5>). This dataset also contains the TPMs of the bioreactor and the  
560 *Pseudomonas* spp. transcriptomes and the amino acid sequences of the amidase genes used to create the  
561 phylogenetic trees in Figure 3 and supplementary Figure S2.

562

## 563 **DECLARATION OF COMPETING INTEREST**

564 The authors declare that they have no known competing financial interests or personal relationships that  
565 could have appeared to influence the work reported in this paper.

566

## 567 **ACKNOWLEDGEMENTS**

568 The authors thank Stefan Hertel and Erwin Koetse for letting us take sludge from the MBR and GAC of  
569 Pharmafilter. We also thank Rob de Graaf for sharing his expertise with the HPLC and Guylaine Nuijten for  
570 her help with bioreactors. This research was supported by NWO-TTW grant 15759 and NWO/OCW grant



571 SIAM 024002002.

572 **REFERENCES**

- 573 Aharon, E., Mookherjee, A., Pérez-Montaña, F., Mateus da Silva, G., Sathyamoorthy, R., Burdman, S. and  
574 Jurkevitch, E. 2021. Secretion systems play a critical role in resistance to predation by *Bdellovibrio*  
575 *bacteriovorus*. *Research in Microbiology* 172(7), 103878.
- 576 Alneberg, J., Bjarnason, B.S., de Bruijn, I., Schirmer, M., Quick, J., Ijaz, U.Z., Lahti, L., Loman, N.J.,  
577 Andersson, A.F. and Quince, C. 2014. Binning metagenomic contigs by coverage and composition.  
578 *Nature Methods* 11(11), 1144-1146.
- 579 Brown, C.T., Hug, L.A., Thomas, B.C., Sharon, I., Castelle, C.J., Singh, A., Wilkins, M.J., Wrighton, K.C.,  
580 Williams, K.H. and Banfield, J.F. 2015. Unusual biology across a group comprising more than 15%  
581 of domain Bacteria. *Nature* 523(7559), 208-211.
- 582 Callahan, B.J., McMurdie, P.J., Rosen, M.J., Han, A.W., Johnson, A.J.A. and Holmes, S.P. 2016. DADA2:  
583 High-resolution sample inference from Illumina amplicon data. *Nature Methods* 13(7), 581-583.
- 584 Chaumeil, P.-A., Mussig, A.J., Hugenholtz, P. and Parks, D.H. 2019. GTDB-Tk: a toolkit to classify  
585 genomes with the Genome Taxonomy Database. *Bioinformatics* 36(6), 1925-1927.
- 586 Chen, Q., Chen, K., Ni, H., Zhuang, W., Wang, H., Zhu, J., He, Q. and He, J. 2016. A novel  
587 amidohydrolase (DmhA) from *Sphingomonas* sp. that can hydrolyze the organophosphorus pesticide  
588 dimethoate to dimethoate carboxylic acid and methylamine. *Biotechnology Letters* 38(4), 703-710.
- 589 Cremers, G., Jetten, M.S.M., Op den Camp, H.J.M. & Lückner, S. (2022) Metascan: METabolic Analysis,  
590 SCreening and Annotation of metagenomes. *Front. Bioinform. Genomic Analysis* Under revision
- 591 D'Souza, A.W., Potter, R.F., Wallace, M., Shupe, A., Patel, S., Sun, X., Gul, D., Kwon, J.H., Andleeb, S.,  
592 Burnham, C.-A.D. and Dantas, G. 2019. Spatiotemporal dynamics of multidrug resistant bacteria  
593 on intensive care unit surfaces. *Nat Commun* 10(1), 4569-4569.
- 594 De Gusseme, B., Vanhaecke, L., Verstraete, W. and Boon, N. 2011. Degradation of acetaminophen by  
595 *Delftia tsuruhatensis* and *Pseudomonas aeruginosa* in a membrane bioreactor. *Water Research* 45(4),  
596 1829-1837.
- 597 dos S. Grignet, R., Barros, M.G.A., Panatta, A.A.S., Bernal, S.P.F., Ottoni, J.R., Passarini, M.R.Z. and da C.  
598 S. Gonçalves, C. 2022. Medicines as an emergent contaminant: the review of microbial  
599 biodegradation potential. *Folia Microbiologica*.
- 600 Eddy, S.R. 2009. A new generation of homology search tools based on probabilistic inference. *Genome*  
601 *Inform* 23(1), 205-211.
- 602 Edgar, R.C. 2004. MUSCLE: a multiple sequence alignment method with reduced time and space  
603 complexity. *BMC Bioinformatics* 5(1), 113.
- 604 Ferraroni, M., Seifert, J., Travkin, V.M., Thiel, M., Kaschabek, S., Scozzafava, A., Golovleva, L.,  
605 Schlömann, M. and Briganti, F. 2005. Crystal Structure of the Hydroxyquinol 1,2-Dioxygenase  
606 from *Nocardioides simplex* 3E, a Key Enzyme Involved in Polychlorinated Aromatics  
607 Biodegradation\*. *Journal of Biological Chemistry* 280(22), 21144-21154.
- 608 Gavrilesco, M., Demnerová, K., Aamand, J., Agathos, S. and Fava, F. 2015. Emerging pollutants in the  
609 environment: present and future challenges in biomonitoring, ecological risks and bioremediation.  
610 *New Biotechnology* 32(1), 147-156.
- 611 Ghaly, T.M., Paulsen, I.T., Sajjad, A., Tetu, S.G. and Gillings, M.R. 2020. A Novel Family of  
612 *Acinetobacter* Mega-Plasmids Are Disseminating Multi-Drug Resistance Across the Globe While  
613 Acquiring Location-Specific Accessory Genes. *Frontiers in Microbiology* 11.
- 614 Graham, E.D., Heidelberg, J.F. and Tully, B.J. 2017. BinSanity: unsupervised clustering of environmental  
615 microbial assemblies using coverage and affinity propagation. *PeerJ* 5, e3035.
- 616 Hart, A. and Orr, D.L.J. 1974. Degradation of paracetamol by a *Penicillium* species. *Journal of Pharmacy*  
617 *and Pharmacology* 26(Supplement\_1), 70P-71P.
- 618 He, Z. and Spain, J.C. 1998. A novel 2-aminomuconate deaminase in the nitrobenzene degradation pathway  
619 of *Pseudomonas pseudoalcaligenes* JS45. *J Bacteriol* 180(9), 2502-2506.
- 620 Higgins, D.G. and Sharp, P.M. 1988. CLUSTAL: a package for performing multiple sequence alignment on  
621 a microcomputer. *Gene* 73(1), 237-244.
- 622 Hintner, J.P., Reemtsma, T. and Stolz, A. 2004. Biochemical and molecular characterization of a ring  
623 fission dioxygenase with the ability to oxidize (substituted) salicylate(s) from *Pseudaminobacter*

- 624 salicylatoxidans. *J Biol Chem* 279(36), 37250-37260.
- 625 Hu, J., Zhang, L.L., Chen, J.M. and Liu, Y. 2013. Degradation of paracetamol by *Pseudomonas aeruginosa*  
626 strain HJ1012. *Journal of Environmental Science and Health, Part A* 48(7), 791-799.
- 627 Hyatt, D., Chen, G.-L., LoCascio, P.F., Land, M.L., Larimer, F.W. and Hauser, L.J. 2010. Prodigal:  
628 prokaryotic gene recognition and translation initiation site identification. *BMC Bioinformatics* 11(1),  
629 119.
- 630 in 't Zandt, M.H., Frank, J., Yilmaz, P., Cremers, G., Jetten, M.S.M. and Welte, C.U. 2020. Long-term  
631 enriched methanogenic communities from thermokarst lake sediments show species-specific  
632 responses to warming. *FEMS Microbes* 1(1).
- 633 Jones, D.T., Taylor, W.R. and Thornton, J.M. 1992. The rapid generation of mutation data matrices from  
634 protein sequences. *Comput Appl Biosci* 8(3), 275-282.
- 635 Kang, D.D., Li, F., Kirton, E., Thomas, A., Egan, R., An, H. and Wang, Z. 2019. MetaBAT 2: an adaptive  
636 binning algorithm for robust and efficient genome reconstruction from metagenome assemblies.  
637 *PeerJ* 7, e7359-e7359.
- 638 Kizny Gordon, A., Phan, H.T.T., Lipworth, S.I., Cheong, E., Gottlieb, T., George, S., Peto, T.E.A., Mathers,  
639 A.J., Walker, A.S., Crook, D.W. and Stoesser, N. 2020. Genomic dynamics of species and mobile  
640 genetic elements in a prolonged blaIMP-4-associated carbapenemase outbreak in an Australian  
641 hospital. *J Antimicrob Chemother* 75(4), 873-882.
- 642 Klindworth, A., Pruesse, E., Schweer, T., Peplies, J., Quast, C., Horn, M. and Glöckner, F.O. 2013.  
643 Evaluation of general 16S ribosomal RNA gene PCR primers for classical and next-generation  
644 sequencing-based diversity studies. *Nucleic Acids Res* 41(1), e1-e1.
- 645 Ko, H.-J., Lee, E.W., Bang, W.-G., Lee, C.-K., Kim, K.H. and Choi, I.-G. 2010. Molecular characterization  
646 of a novel bacterial aryl acylamidase belonging to the amidase signature enzyme family. *Molecules*  
647 and *Cells* 29(5), 485-492.
- 648 Kumar, S., Stecher, G. and Tamura, K. 2016. MEGA7: Molecular Evolutionary Genetics Analysis Version  
649 7.0 for Bigger Datasets. *Mol Biol Evol* 33(7), 1870-1874.
- 650 Lee, S., Park, E.-H., Ko, H.-J., Bang, W.G., Kim, H.-Y., Kim, K.H. and Choi, I.-G. 2015. Crystal structure  
651 analysis of a bacterial aryl acylamidase belonging to the amidase signature enzyme family.  
652 *Biochemical and Biophysical Research Communications* 467(2), 268-274.
- 653 Li de, F., Zhang, J.Y., Hou, Y.J., Liu, L., Hu, Y., Liu, S.J., Wang da, C. and Liu, W. 2013. Structures of  
654 aminophenol dioxygenase in complex with intermediate, product and inhibitor. *Acta Crystallogr D*  
655 *Biol Crystallogr* 69(Pt 1), 32-43.
- 656 McMurdie, P.J. and Holmes, S. 2013. phyloseq: an R package for reproducible interactive analysis and  
657 graphics of microbiome census data. *PloS one* 8(4), e61217.
- 658 Morin, L., Goubet, A., Madigou, C., Pernelle, J.-J., Palmier, K., Labadie, K., Lemainque, A., Michot, O.,  
659 Astoul, L., Barbier, P., Almayrac, J.-L. and Sghir, A. 2020. Colonization kinetics and implantation  
660 follow-up of the sewage microbiome in an urban wastewater treatment plant. *Scientific Reports*  
661 10(1), 11634.
- 662 Müller, S., Strack, S.N., Ryan, S.E., Shawgo, M., Walling, A., Harris, S., Chambers, C., Boddicker, J. and  
663 Kirby, J.R. 2016. Identification of Functions Affecting Predator-Prey Interactions between  
664 *Myxococcus xanthus* and *Bacillus subtilis*. *J Bacteriol* 198(24), 3335-3344.
- 665 Murakami, S., Okuno, T., Matsumura, E., Takenaka, S., Shinke, R. and Aoki, K. 1999. Cloning of a gene  
666 encoding hydroxyquinol 1,2-dioxygenase that catalyzes both intradiol and extradiol ring cleavage of  
667 catechol. *Biosci Biotechnol Biochem* 63(5), 859-865.
- 668 Nurk, S., Meleshko, D., Korobeynikov, A. and Pevzner, P.A. 2017. metaSPAdes: a new versatile  
669 metagenomic assembler. *Genome Res* 27(5), 824-834.
- 670 Palma, T.L., Donaldben, M.N., Costa, M.C. and Carlier, J.D. 2018. Putative Role of *Flavobacterium*,  
671 *Dokdonella* and *Methylophilus* Strains in Paracetamol Biodegradation. *Water, Air, & Soil Pollution*  
672 229(6), 200.
- 673 Park, S. and Oh, S. 2020a. Activated sludge-degrading analgesic drug acetaminophen: Acclimation,  
674 microbial community dynamics, degradation characteristics, and bioaugmentation potential. *Water*  
675 *Research* 182, 115957.
- 676 Park, S. and Oh, S. 2020b. Detoxification and bioaugmentation potential for acetaminophen and its  
677 derivatives using *Ensifer* sp. isolated from activated sludge. *Chemosphere* 260, 127532.
- 678 Parks, D.H., Imelfort, M., Skennerton, C.T., Hugenholtz, P. and Tyson, G.W. 2015. CheckM: assessing the

- 679 quality of microbial genomes recovered from isolates, single cells, and metagenomes. *Genome Res*  
680 25(7), 1043-1055.
- 681 Patil, P.P., Mali, S., Midha, S., Gautam, V., Dash, L., Kumar, S., Shastri, J., Singhal, L. and Patil, P.B. 2017.  
682 Genomics Reveals a Unique Clone of Burkholderia cenocepacia Harboring an Actively Excising  
683 Novel Genomic Island. *Frontiers in Microbiology* 8.
- 684 Petters, S., Groß, V., Söllinger, A., Pichler, M., Reinhard, A., Bengtsson, M.M. and Urich, T. 2021. The soil  
685 microbial food web revisited: Predatory myxobacteria as keystone taxa? *The ISME Journal* 15(9),  
686 2665-2675.
- 687 Poghosyan, L., Koch, H., Frank, J., van Kessel, M.A.H.J., Cremers, G., van Alen, T., Jetten, M.S.M., Op den  
688 Camp, H.J.M. and Lückner, S. 2020. Metagenomic profiling of ammonia- and methane-oxidizing  
689 microorganisms in two sequential rapid sand filters. *Water Research* 185, 116288.
- 690 Rios-Miguel, A.B., Jetten, M.S.M. and Welte, C.U. 2021. Effect of concentration and hydraulic reaction  
691 time on the removal of pharmaceutical compounds in a membrane bioreactor inoculated with  
692 activated sludge. *Microbial Biotechnology* 14(4):1707-1721.
- 693 Rios Miguel, A.B., Jetten, M.S.M. and Welte, C.U. 2020. The role of mobile genetic elements in organic  
694 micropollutant degradation during biological wastewater treatment. *Water Research X* 9, 100065.
- 695 Saitou, N. and Nei, M. 1987. The neighbor-joining method: a new method for reconstructing phylogenetic  
696 trees. *Mol Biol Evol* 4(4), 406-425.
- 697 Saunders, A.M., Albertsen, M., Vollertsen, J. and Nielsen, P.H. 2016. The activated sludge ecosystem  
698 contains a core community of abundant organisms. *The ISME Journal* 10(1), 11-20.
- 699 Sgro, G.G., Oka, G.U., Souza, D.P., Cenens, W., Bayer-Santos, E., Matsuyama, B.Y., Bueno, N.F., dos  
700 Santos, T.R., Alvarez-Martinez, C.E., Salinas, R.K. and Farah, C.S. 2019. Bacteria-Killing Type IV  
701 Secretion Systems. *Frontiers in Microbiology* 10.
- 702 Sieber, C.M.K., Probst, A.J., Sharrar, A., Thomas, B.C., Hess, M., Tringe, S.G. and Banfield, J.F. 2018.  
703 Recovery of genomes from metagenomes via a dereplication, aggregation and scoring strategy.  
704 *Nature Microbiology* 3(7), 836-843.
- 705 Takenaka, S., Murakami, S., Shinke, R., Hatakeyama, K., Yukawa, H. and Aoki, K. 1997. Novel Genes  
706 Encoding 2-Aminophenol 1,6-Dioxygenase from Pseudomonas Species AP-3 Growing on 2-  
707 Aminophenol and Catalytic Properties of the Purified Enzyme\*. *Journal of Biological Chemistry*  
708 272(23), 14727-14732.
- 709 Takenaka, S., Okugawa, S., Kadowaki, M., Murakami, S. and Aoki, K. 2003. The metabolic pathway of 4-  
710 aminophenol in Burkholderia sp. strain AK-5 differs from that of aniline and aniline with C-4  
711 substituents. *Appl Environ Microbiol* 69(9), 5410-5413.
- 712 Tamura, K., Stecher, G. and Kumar, S. 2021. MEGA11: Molecular Evolutionary Genetics Analysis Version  
713 11. *Mol Biol Evol* 38(7), 3022-3027.
- 714 Team, R.C. 2013. R: A language and environment for statistical computing.
- 715 Wang, Y., Liu, K.F., Yang, Y., Davis, I. and Liu, A. 2020. Observing 3-hydroxyanthranilate-3,4-  
716 dioxygenase in action through a crystalline lens. *Proceedings of the National Academy of Sciences*  
717 117(33), 19720-19730.
- 718 Wang, Y., Shin, I., Fu, Y., Colabroy, K.L. and Liu, A. 2019. Crystal Structures of L-DOPA Dioxygenase  
719 from Streptomyces sclerotialus. *Biochemistry* 58(52), 5339-5350.
- 720 Wickham, H. and Wickham, M.H. 2007. The ggplot package. URL: <https://cran.r-project.org/web/packages/ggplot2/index.html>.
- 721
- 722 Wilkinson John, L., Boxall Alistair, B.A., Kolpin Dana, W., Leung Kenneth, M.Y., Lai Racliffe, W.S.,  
723 Galbán-Malagón, C., Adell Aiko, D., Mondon, J., Metian, M., Marchant Robert, A., Bouzas-  
724 Monroy, A., Cuni-Sanchez, A., Coors, A., Carriquiriborde, P., Rojo, M., Gordon, C., Cara, M.,  
725 Moermond, M., Luarte, T., Petrosyan, V., Perikhanyan, Y., Mahon Clare, S., McGurk Christopher,  
726 J., Hofmann, T., Kormoker, T., Iniguez, V., Guzman-Otazo, J., Tavares Jean, L., Gildasio De  
727 Figueiredo, F., Razzolini Maria, T.P., Dougnon, V., Gbaguidi, G., Traoré, O., Blais Jules, M., Kimpe  
728 Linda, E., Wong, M., Wong, D., Ntchantcho, R., Pizarro, J., Ying, G.-G., Chen, C.-E., Pérez, M.,  
729 Martínez-Lara, J., Otamonga, J.-P., Poté, J., Ifo Suspense, A., Wilson, P., Echeverría-Sáenz, S.,  
730 Udikovic-Kolic, N., Milakovic, M., Fatta-Kassinou, D., Ioannou-Ttofa, L., Belušová, V., Vymazal,  
731 J., Cárdenas-Bustamante, M., Kassa Bayable, A., Garric, J., Chaumot, A., Gibba, P., Kunchulia, I.,  
732 Seidensticker, S., Lyberatos, G., Halldórsson Halldór, P., Melling, M., Shashidhar, T., Lamba, M.,  
733 Nastiti, A., Supriatin, A., Pourang, N., Abedini, A., Abdullah, O., Gharbia Salem, S., Pilla, F.,

- 734 Chefetz, B., Topaz, T., Yao Koffi, M., Aubakirova, B., Beisenova, R., Olaka, L., Mulu Jemimah, K.,  
735 Chatanga, P., Ntuli, V., Blama Nathaniel, T., Sherif, S., Aris Ahmad, Z., Looi Ley, J., Niang, M.,  
736 Traore Seydou, T., Oldenkamp, R., Ogunbanwo, O., Ashfaq, M., Iqbal, M., Abdeen, Z., O’Dea, A.,  
737 Morales-Saldaña Jorge, M., Custodio, M., de la Cruz, H., Navarrete, I., Carvalho, F., Gogra Alhaji,  
738 B., Koroma Bashiru, M., Cerkvenik-Flajs, V., Gombač, M., Thwala, M., Choi, K., Kang, H., Ladu  
739 John, L.C., Rico, A., Amerasinghe, P., Sobek, A., Horlitz, G., Zenker Armin, K., King Alex, C.,  
740 Jiang, J.-J., Kariuki, R., Tumbo, M., Tezel, U., Onay Turgut, T., Lejju Julius, B., Vystavna, Y.,  
741 Vergeles, Y., Heinzen, H., Pérez-Parada, A., Sims Douglas, B., Figy, M., Good, D. and Teta, C.  
742 2022. Pharmaceutical pollution of the world’s rivers. *Proceedings of the National Academy of*  
743 *Sciences* 119(8), e2113947119.
- 744 Wu, Y.-W., Simmons, B.A. and Singer, S.W. 2015. MaxBin 2.0: an automated binning algorithm to recover  
745 genomes from multiple metagenomic datasets. *Bioinformatics* 32(4), 605-607.
- 746 Yilmaz, P., Parfrey, L.W., Yarza, P., Gerken, J., Pruesse, E., Quast, C., Schweer, T., Peplies, J., Ludwig, W.  
747 and Glöckner, F.O. 2014. The SILVA and "All-species Living Tree Project (LTP)" taxonomic  
748 frameworks. *Nucleic Acids Res* 42(Database issue), D643-648.
- 749 Yun, H., Liang, B., Qiu, J., Zhang, L., Zhao, Y., Jiang, J. and Wang, A. 2017. Functional Characterization  
750 of a Novel Amidase Involved in Biotransformation of Triclocarban and its Dehalogenated Congeners  
751 in *Ochrobactrum* sp. TCC-2. *Environ Sci Technol* 51(1), 291-300.
- 752 Zhang, J., Yin, J.-G., Hang, B.-J., Cai, S., He, J., Zhou, S.-G. and Li, S.-P. 2012. Cloning of a novel  
753 arylamidase gene from *Paracoccus* sp. strain FLN-7 that hydrolyzes amide pesticides. *Appl Environ*  
754 *Microbiol* 78(14), 4848-4855.
- 755 Zhang, L., Hang, P., Zhou, X., Dai, C., He, Z. and Jiang, J. 2020. Mineralization of the herbicide swep by a  
756 two-strain consortium and characterization of a new amidase for hydrolyzing swep. *Microbial Cell*  
757 *Factories* 19(1), 4.
- 758 Zhang, L., Hu, J., Zhu, R., Zhou, Q. and Chen, J. 2013. Degradation of paracetamol by pure bacterial  
759 cultures and their microbial consortium. *Applied Microbiology and Biotechnology* 97(8), 3687-  
760 3698.
- 761 Zhang, L., Hu, Q., Hang, P., Zhou, X. and Jiang, J. 2019. Characterization of an arylamidase from a newly  
762 isolated propanil-transforming strain of *Ochrobactrum* sp. PP-2. *Ecotoxicology and Environmental*  
763 *Safety* 167, 122-129.
- 764 Zou, D., Huang, Y., Liu, W., Yang, Z., Dong, D., Huang, S., He, X., Ao, D., Liu, N., Wang, S., Wang, Y.,  
765 Tong, Y., Yuan, J. and Huang, L. 2017. Complete sequences of two novel bla (NDM-1)-harbouring  
766 plasmids from two *Acinetobacter towneri* isolates in China associated with the acquisition of Tn125.  
767 *Scientific reports* 7(1), 9405-9405.
- 768 Żur, J., Piński, A., Marchlewicz, A., Hupert-Kocurek, K., Wojcieszynska, D. and Guzik, U. 2018a. Organic  
769 micropollutants paracetamol and ibuprofen—toxicity, biodegradation, and genetic background of  
770 their utilization by bacteria. *Environmental Science and Pollution Research* 25(22), 21498-21524.
- 771 Żur, J., Wojcieszynska, D., Hupert-Kocurek, K., Marchlewicz, A. and Guzik, U. 2018b. Paracetamol –  
772 toxicity and microbial utilization. *Pseudomonas moorei* KB4 as a case study for exploring  
773 degradation pathway. *Chemosphere* 206, 192-202.
- 774

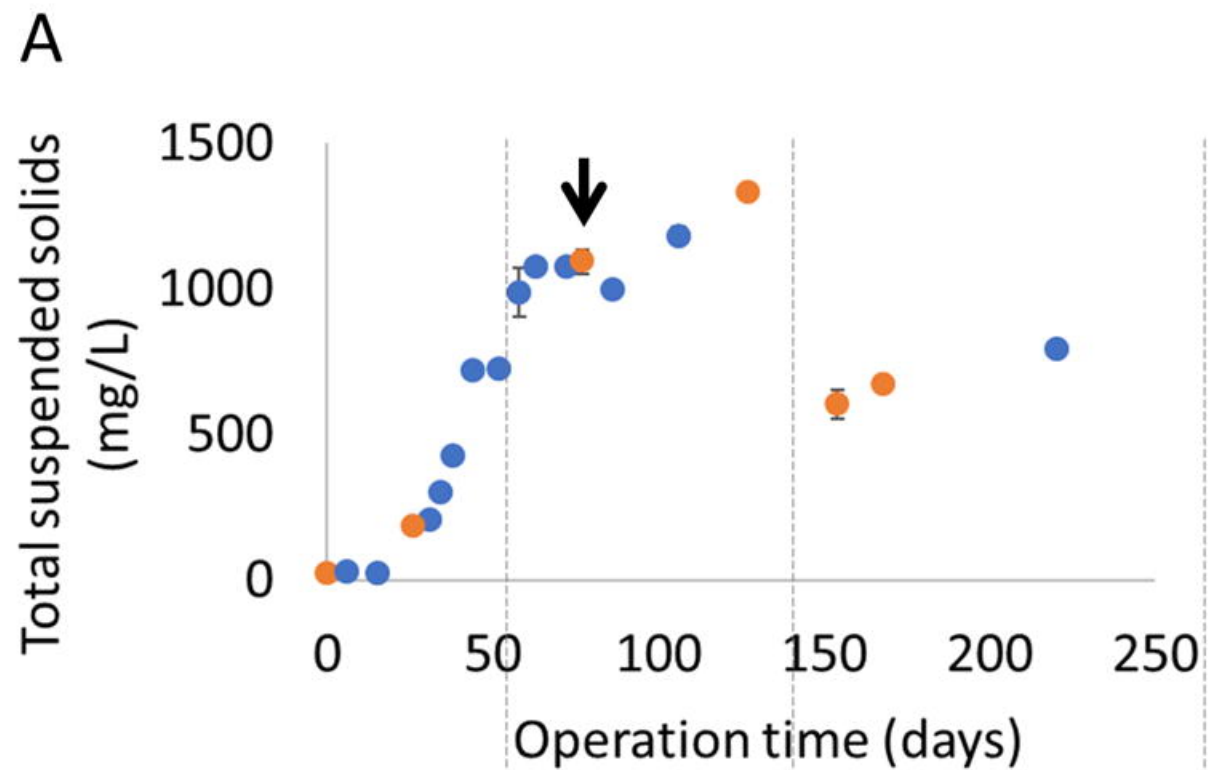

|                              |                |     |     |
|------------------------------|----------------|-----|-----|
| HRT (days)                   | 2.4 -> 1.8     | 1.8 | 3.7 |
| SRT (days)                   | $\infty$ -> 10 | 10  | 10  |
| [APAP] <sub>inf</sub> (mg/L) | 50 -> 400      | 400 | 400 |

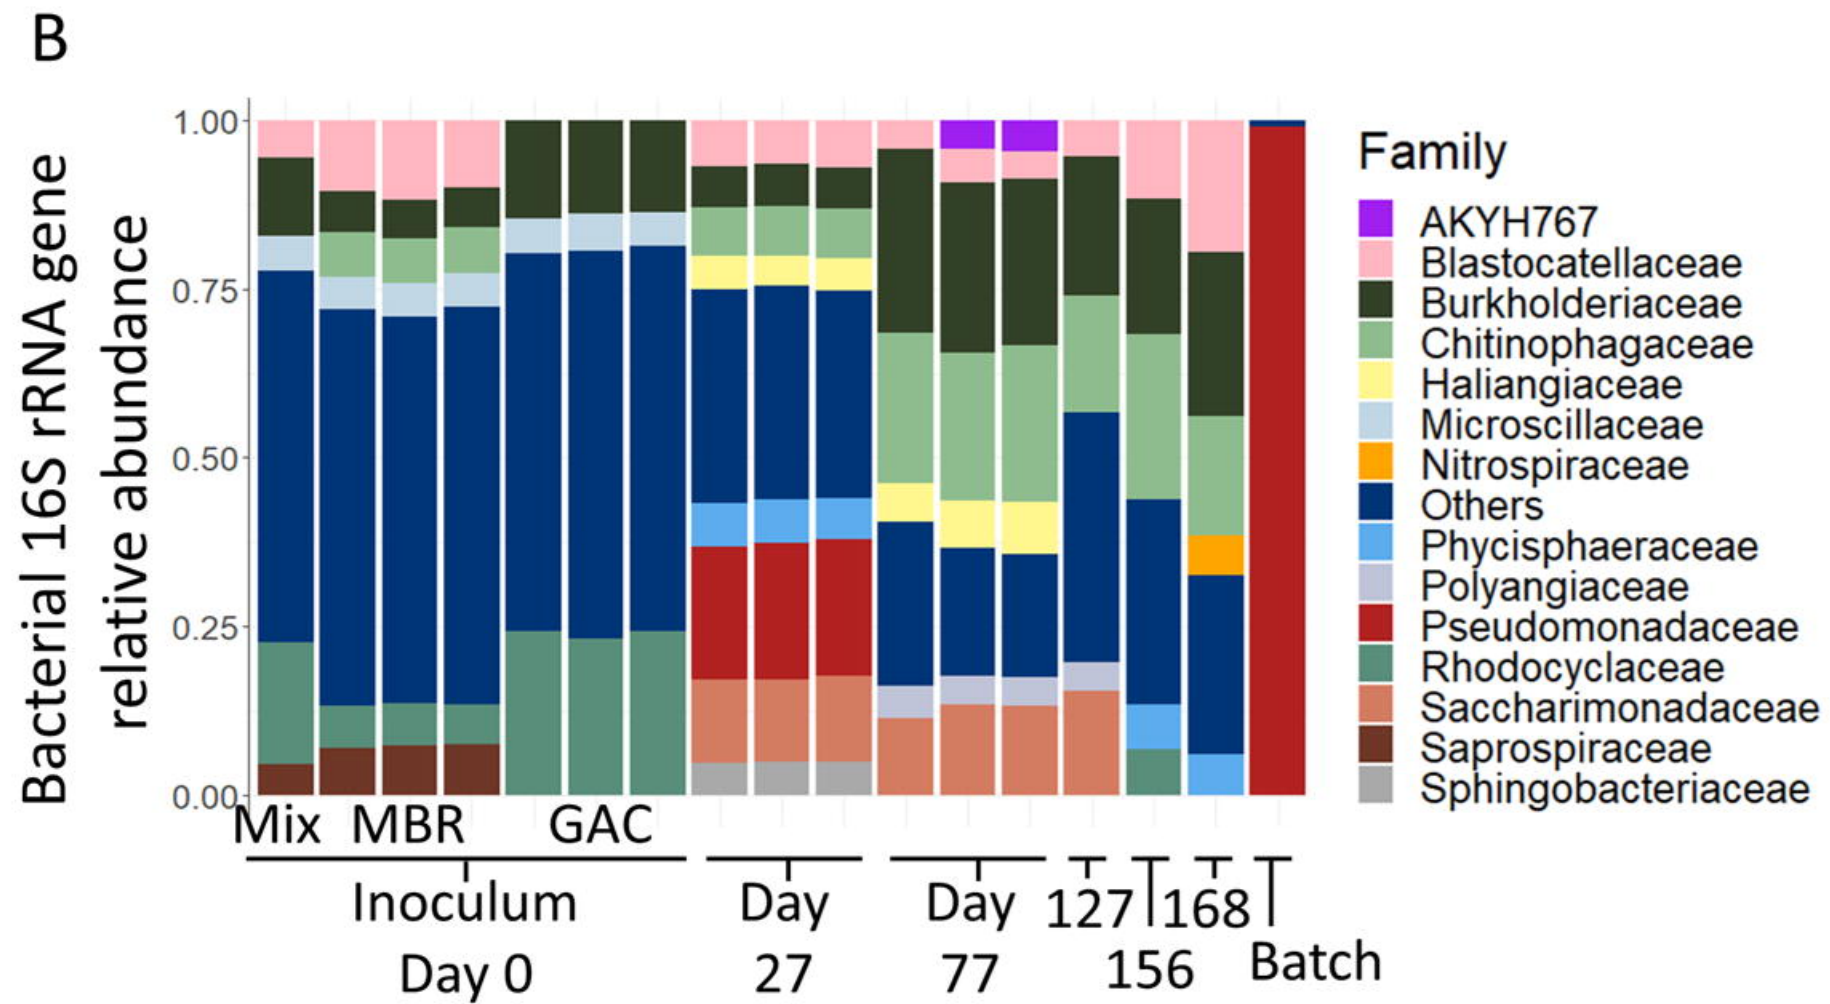

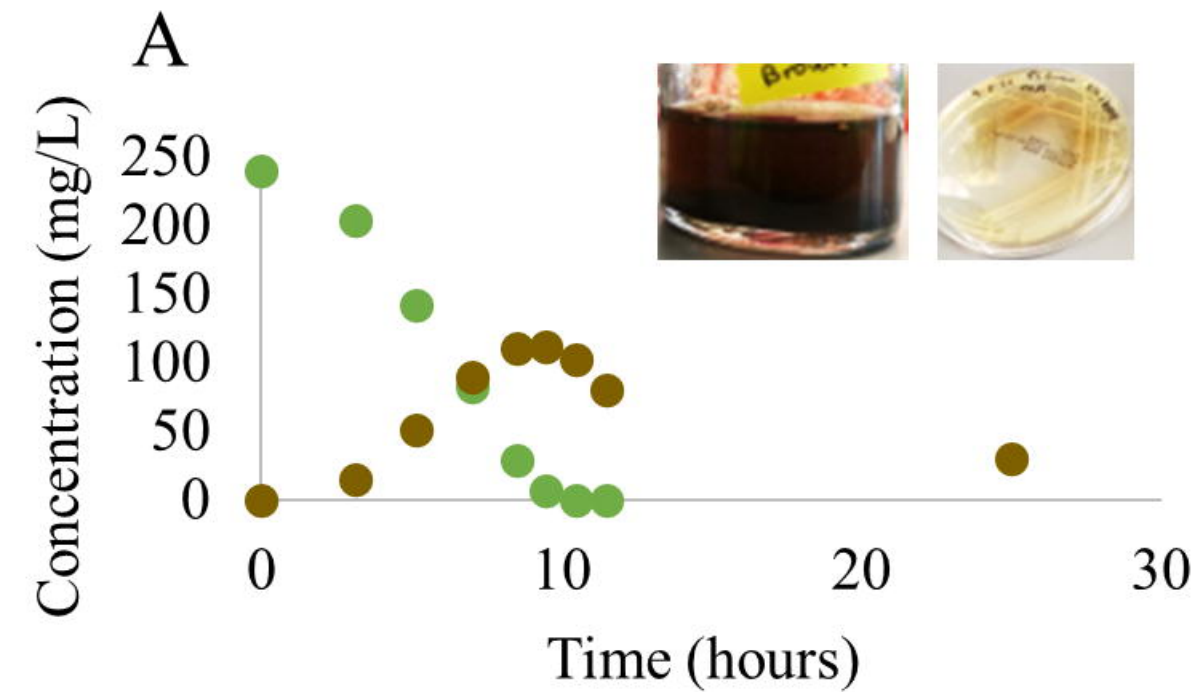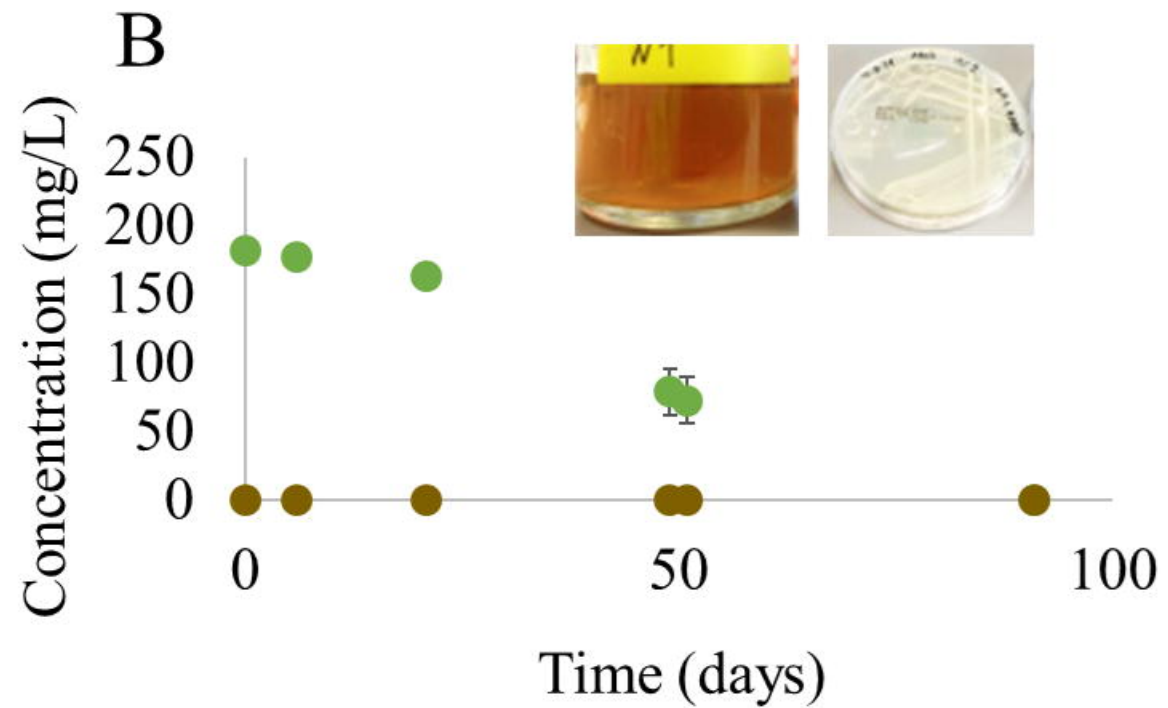

● APAP ● 4-AP

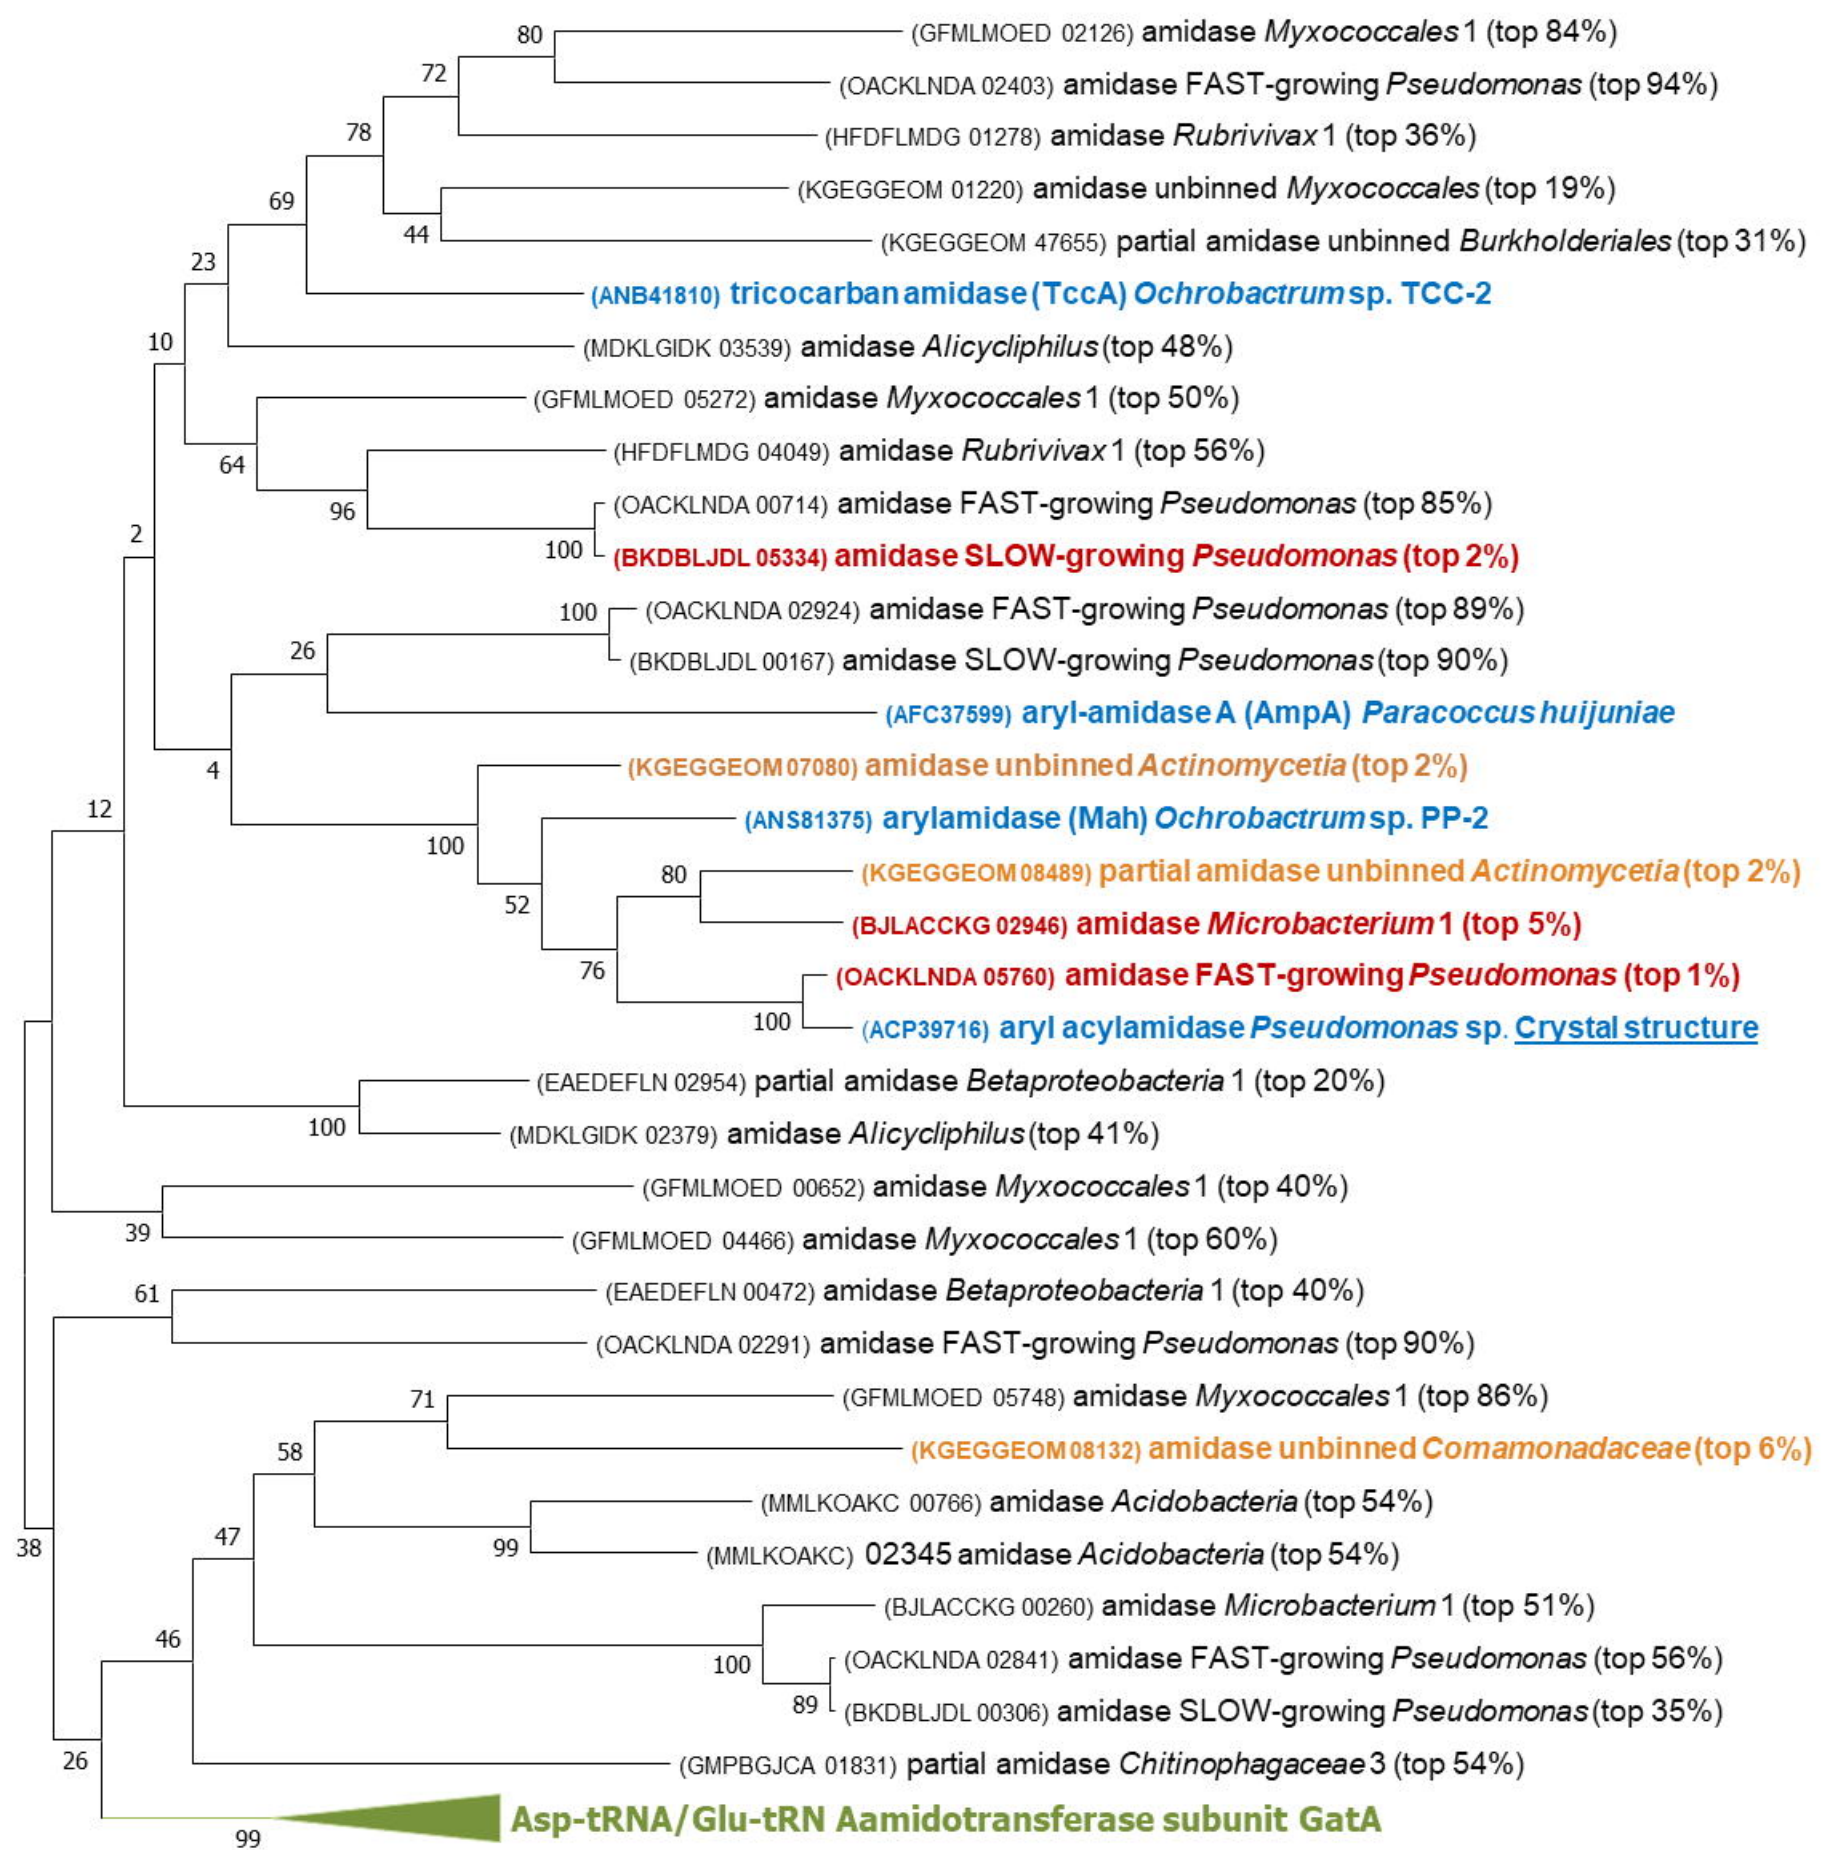

0.20

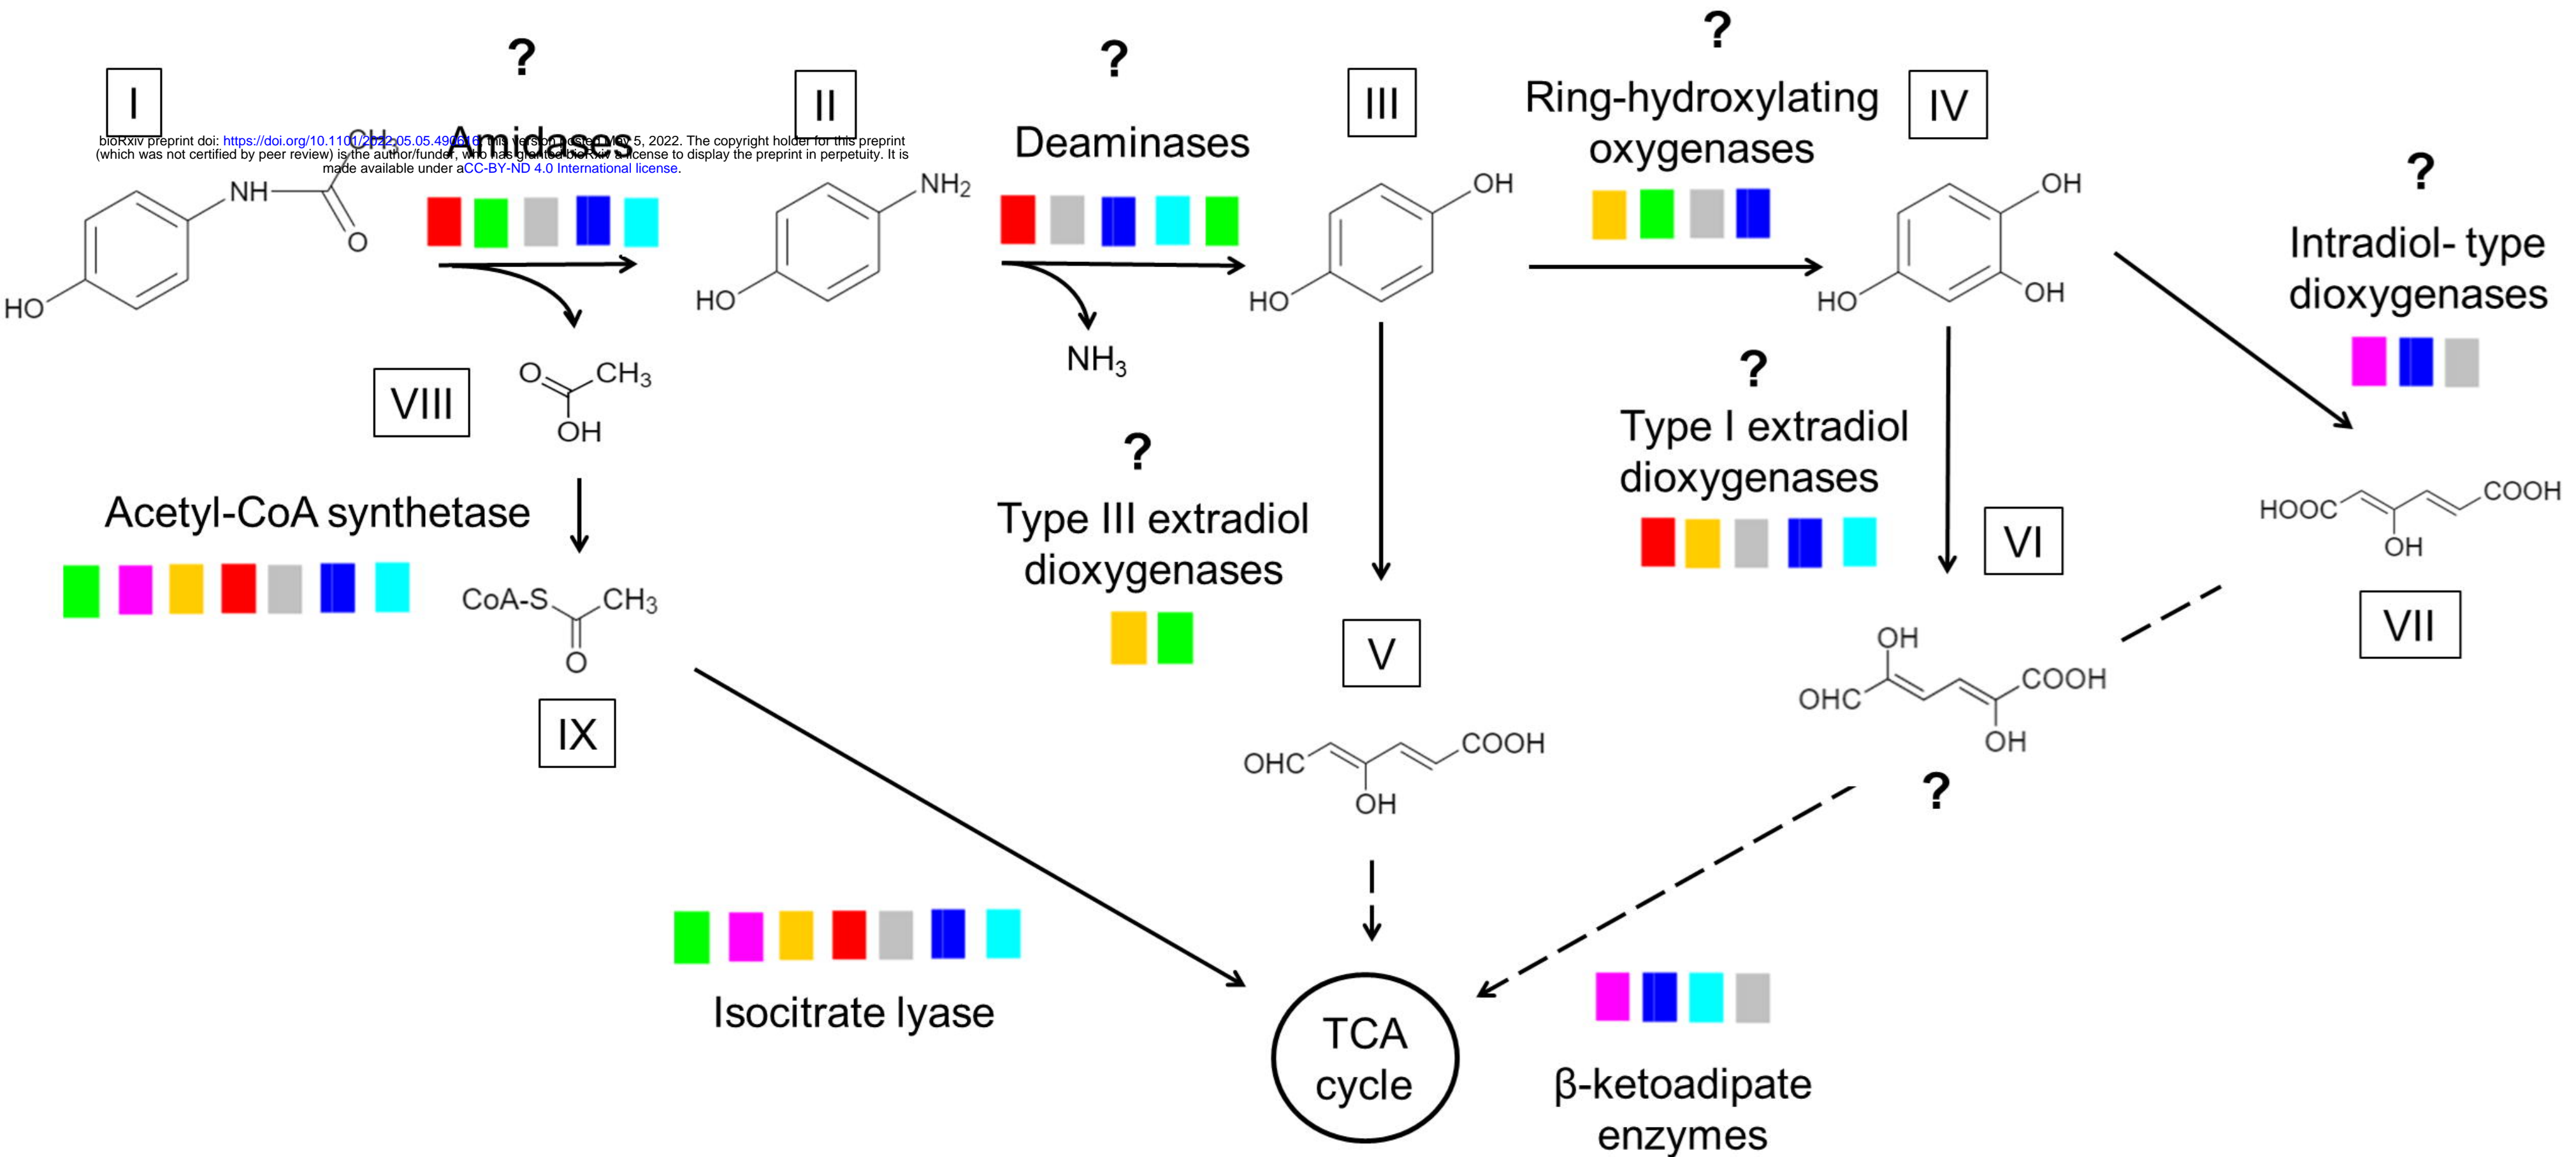



**Table 1. Metagenome-assembled genomes (MAGs) from the bioreactor at day 77.** CheckM was used to check the quality of the MAGs. Taxonomy was assigned until the highest level possible using GTDB-Tk. RNA coverage is the average of three replicate samples while DNA coverage is based on one sample.

| <b>MAG<br/>(metaspades + das_tool)</b>                 | <b>Completeness<br/>(%)</b> | <b>Contamination<br/>(%)</b> | <b>Strain<br/>heterogeneity</b> | <b>Genome<br/>size (Mbp)</b> | <b>DNA<br/>coverage</b> | <b>RNA<br/>coverage<br/>± SD</b> |
|--------------------------------------------------------|-----------------------------|------------------------------|---------------------------------|------------------------------|-------------------------|----------------------------------|
| <i>Chitinophagaceae_2;</i><br><i>g_Niabella</i>        | 98.2                        | 0.7                          | 0.0                             | 3.4                          | 51.4                    | <b>15.5 ± 4.2</b>                |
| <i>Myxococcales_1;</i><br><i>g_Haliangium</i>          | 87.1                        | 3.3                          | 0.0                             | 7.5                          | 21.3                    | <b>15.3 ± 5.5</b>                |
| <i>Bacteroidetes;</i><br><i>f_Sphingobacteriaceae</i>  | 98.7                        | 1.0                          | 100.0                           | 3.2                          | 9.7                     | <b>5.4 ± 1.8</b>                 |
| <i>Chitinophagaceae_1;</i><br><i>g_Niastella</i>       | 98.3                        | 2.7                          | 77.8                            | 3.0                          | 10.7                    | <b>3.7 ± 1.2</b>                 |
| <i>Patescibacteria;</i><br><i>f_Saccharimonadaceae</i> | 66.4                        | 3.4                          | 20.0                            | 1.1                          | 26.7                    | <b>3.3 ± 0.2</b>                 |
| <i>Microbacterium</i>                                  | 100.0                       | 0.0                          | 0.0                             | 3.5                          | 27.0                    | <b>2.8 ± 1.1</b>                 |
| <i>Acidobacteria</i>                                   | 97.4                        | 3.7                          | 0.0                             | 4.7                          | 11.1                    | <b>2.1 ± 0.4</b>                 |
| <i>Rubrivivax</i>                                      | 80.2                        | 40.0                         | 12.4                            | 6.4                          | 7.1                     | <b>1.6 ± 0.5</b>                 |
| <i>Myxococcales_2;</i><br><i>g_Haliangium</i>          | 77.4                        | 6.3                          | 30                              | 10.3                         | 8.1                     | <b>1.4 ± 0.3</b>                 |
| <i>Alicyclophilus denitrificans</i>                    | 98.1                        | 1.6                          | 69.2                            | 4.8                          | 16.6                    | <b>1.4 ± 0.4</b>                 |
| <i>Chitinophagaceae_3;</i><br><i>g_Niabella</i>        | 76.1                        | 1                            | 20                              | 3.1                          | 4.6                     | <b>1.3 ± 0.4</b>                 |
| <i>Betaproteobacteria;</i>                             | 95.7                        | 11.4                         | 75.0                            | 4.9                          | 20.1                    | <b>1.1 ± 0.3</b>                 |

|                                                  |      |      |    |     |     |                  |
|--------------------------------------------------|------|------|----|-----|-----|------------------|
| <i>o_Burkholderiales</i>                         |      |      |    |     |     |                  |
| <i>Actinomycetales;</i><br><i>g_Nocardioides</i> | 54.8 | 2.3  | 0  | 2.0 | 4.5 | <b>0.8 ± 0.5</b> |
| <i>Comamonadaceae</i>                            | 52.0 | 4.01 | 20 | 3.6 | 4.7 | <b>0.6 ± 0.2</b> |
